# 1 **A programmable probiotic encapsulation system enhances therapeutic delivery *in vivo***

2  
3 Tetsuhiro Harimoto<sup>1\*</sup>, Jaeseung Hahn<sup>1\*</sup>, Yu-Yu Chen<sup>1</sup>, Jongwon Im<sup>1</sup>, Joanna Zhang<sup>1</sup>, Nicholas  
4 Hou<sup>1</sup>, Fangda Li<sup>2</sup>, Courtney Coker<sup>1</sup>, Kelsey Gray<sup>1</sup>, Nicole Harr<sup>1</sup>, Sreyan Chowdhury<sup>1,2</sup>, Kelly Pu<sup>1</sup>,  
5 Clare Nimura<sup>1</sup>, Nicholas Arpaia<sup>2,3</sup>, Kam Leong<sup>1,4†</sup>, Tal Danino<sup>1,3,5†</sup>

6  
7 <sup>1</sup>Department of Biomedical Engineering, Columbia University, New York, NY 10027, USA.

8 <sup>2</sup>Department of Microbiology and Immunology, Vagelos College of Physicians and Surgeons,  
9 Columbia University, New York, NY 10032, USA.

10 <sup>3</sup>Herbert Irving Comprehensive Cancer Center, Columbia University, New York, NY 10032, USA.

11 <sup>4</sup>Department of Systems Biology, Columbia University Medical Center, New York, NY 10032, USA.

12 <sup>5</sup>Data Science Institute, Columbia University, New York, NY 10027, USA.

13  
14 \*These authors contributed equally to this work.

15 †Co-corresponding authors. Email: [kam.leong@columbia.edu](mailto:kam.leong@columbia.edu), [tal.danino@columbia.edu](mailto:tal.danino@columbia.edu)

## 16 17 **Abstract**

18 Recent advances in therapeutic modulation of human microbiota have driven new efforts to  
19 engineer living microbial medicines using synthetic biology. However, a long-standing challenge  
20 for live bacterial therapies is balancing the high dose required to achieve robust efficacy with the  
21 potential for sepsis. Here, we developed a genetically encoded microbial encapsulation system  
22 with tunable and dynamic expression of surface capsular polysaccharides to enhance therapeutic  
23 delivery. Following a synthetic small RNA knockdown screen of the capsular biosynthesis  
24 pathway, we constructed synthetic gene circuits that regulate bacterial encapsulation based on  
25 sensing the levels of environmental inducer, bacterial density, and blood pH. The induced  
26 encapsulation system enabled tunable immunogenicity and survivability of the probiotic  
27 *Escherichia coli*, resulting in increased maximum tolerated dose and enhanced efficacy in murine  
28 cancer models. Furthermore, triggering *in situ* encapsulation was found to increase microbial  
29 translocation between mouse tumors, leading to efficacy in distal tumors. The programmable  
30 encapsulation system demonstrates a new approach to control microbial therapeutic profiles *in*  
31 *vivo* using synthetic biology.

## 32 33 **Main Text**

34 The microbiome plays numerous functional roles in human health and subsequently has led to  
35 focused interest in the use of live bacteria to treat disease<sup>1,2</sup>. Since microbes can be engineered  
36 as intelligent living medicines that sense and respond to environments, they can colonize niches  
37 in the gastrointestinal tract<sup>3,4</sup>, mouth<sup>5</sup>, skin<sup>6</sup>, lung<sup>7</sup>, and tumors<sup>8,9</sup>, and locally deliver therapeutics.  
38 However, host toxicity from live bacteria has been shown to limit tolerated dose and efficacy, in  
39 some cases leading to termination of clinical trials<sup>10-13</sup>. Moreover, unlike conventional drug carriers,  
40 the unique abilities of bacteria to continuously proliferate, chemotax, and produce therapeutic  
41 payloads in disease sites necessitates robust and temporal control of bacterial pharmacokinetics  
42 *in vivo*. One approach to circumvent toxicity is the generation of genetic knockouts of  
43 immunogenic bacterial surface antigens such as lipopolysaccharide (LPS), but this strategy can  
44 result in permanent strain attenuation and reduced colonization, as seen in clinical trials of  
45 bacteria cancer therapy<sup>11,14,15</sup>. Surface modulation has been widely utilized in cloaking drug  
46 delivery vehicles<sup>16</sup>, and thus an alternative strategy is the synthetic coating of microbial surfaces  
47 with molecules such as alginate<sup>17,18</sup>, chitosan<sup>17</sup>, polydopamine<sup>19</sup>, lipids<sup>20-22</sup>, and nanoparticles<sup>23</sup>.  
48 However, these one-time, static modifications of bacteria do not allow for *in situ* modulation and  
49 can lead to uncontrolled growth, off-target toxicity, or compromised cellular function resulting in  
50 reduced efficacy.

51

52 Here, we present a tunable microbial surface engineering strategy using synthetic gene circuits  
53 to dynamically control bacterial interactions with their surrounding environment. We focused on  
54 bacterial surface capsular polysaccharides (CAP), a natural extracellular biopolymer that coats  
55 the extracellular membrane and protects microbes from a variety of environmental conditions<sup>24</sup>.  
56 By applying a synthetic biology approach to engineer CAP biosynthesis, we constructed  
57 programmable CAP expression systems that sense environmental cues and controllably  
58 modulate the bacterial surface, thereby modulating bacterial interaction with antimicrobials,  
59 bacteriophage, acidity, and host immunity. This design allows precise control over bacterial  
60 immunogenicity and survivability *in vivo*, enabling novel drug delivery strategies such as  
61 enhanced dosing and *in situ* trafficking to maximize therapeutic efficacy and safety (Fig. 1).

### 62 **sRNA knockdown screen identifies key regulators of CAP synthesis**

63 Since various bacteria have been utilized for therapeutic applications, we compared  
64 immunogenicity and viability of several *E. coli* and *S. typhimurium* strains. Here *E. coli* Nissle 1917  
65 (EcN), a probiotic strain with favorable clinical profiles<sup>25</sup>, demonstrated high viability in human  
66 whole blood with minimal cytokine induction (Supplementary Fig. 1a,b). Because the K5-type CAP  
67 of EcN has been shown to alter interaction with host immune systems<sup>26-29</sup>, we chose to genetically  
68 modify its biosynthetic pathway<sup>30,31</sup>. K5-type CAP produced from EcN, also known as heparosan,  
69 is composed of a polymer chain of alternating  $\beta$ -D-glucuronic acid (GlcA) and N-acetyl- $\alpha$ -D-  
70 glucosamine (GlcNAc), attached to 3-deoxy-D-manno-oct-2-ulosonic acid (Kdo) linker (Fig. 2a).  
71 Glycotransferases of *kfiABCD* genes polymerize alternating GlcA and GlcNAc subunits. *kpsCSFU*  
72 genes are responsible for synthesis of the poly-Kdo linker on the terminal lipid, and CAP is  
73 transported to the cellular surface by *kpsEDMT* genes. While individual functions of the CAP  
74 genes have been investigated, engineering tunable and dynamic control of this system remains  
75 unexplored.

76  
77 We sought to identify key CAP genes capable of altering response to antibacterial factors  
78 encountered during therapeutic delivery. To do so, we generated a library of knockdown (KD)  
79 strains using synthetic small RNAs (sRNAs) that reduce expression of *kfi* and *kps* genes via  
80 complementary binding to mRNAs<sup>32</sup>. To initially assess the impact of downregulating each gene,  
81 we screened the growth of KD strains in (1) nutrient-rich media, (2) human whole blood, and (3)  
82 CAP-targeting phage. Growth in nutrient-rich media showed little variation in maximum specific  
83 growth rates ( $\mu_m$ ) from the wild-type EcN strain (expressing CAP) (Fig. 2b, Supplementary Fig.  
84 2a), suggesting that the downregulation of the targeted genes in the CAP biosynthetic pathway  
85 does not greatly affect the fitness of EcN in the absence of environmental threats. However, we  
86 observed significantly reduced viability of KD strains compared to EcN after incubation in whole  
87 blood for 0.5 hours (Supplementary Fig. 2b). After a 6-hour incubation in whole blood, KD strains  
88 in CAP synthesis (*kfi* genes and *kpsFU*) exhibited lower viability compared to KD strains in CAP  
89 transport (*kpsEDMT*) (Fig. 2b). To assess whether each gene KD causes a complete or partial  
90 loss of CAP in KD strains, we used lytic bacteriophage  $\Phi$ K1-5 that specifically binds to heparosan  
91 of EcN<sup>29,33</sup>. Bacteria that express residual levels of heparosan CAP are susceptible to this phage,  
92 but complete loss of CAP confers immunity. We quantified phage sensitivity of each strain by  
93 measuring area under the curve of the phage-inoculated growth curve<sup>34</sup> and observed that sRNA  
94 KD of most CAP genes did not alter phage sensitivity compared to control EcN (Fig. 2b,  
95 Supplementary Fig. 2c), suggesting some level of CAP is still present in KD strains. To abrogate  
96 the effect of residual CAP gene expression, we next constructed a library of knockout (KO) strains  
97 by deleting CAP synthesis genes from EcN genome using Lambda Red recombineering system.  
98 All *kfi* KO strains resulted in complete phage immunity (Supplementary Fig. 2d), supporting loss  
99 of CAP expression. Importantly, KO strains demonstrated significantly increased blood sensitivity  
100 (Supplementary Fig. 2e), indicating that CAP levels can be genetically tuned to alter sensitivities  
101 to antibacterial factors.

103  
104 On the basis of the above results, we chose to further characterize *kfiC*, a well-studied gene that  
105 encodes an essential glycotransferase of GlcA<sup>26,29</sup>. Downregulation of *kfiC* via sRNA KD  
106 sensitized bacteria in blood, suggesting its key role in regulating bacterial protection. Deletion of  
107 *kfiC* resulted in the highest enhancement in blood sensitivity, indicating that the level of protection  
108 can be altered by controlling gene expression. To confirm loss of CAP from the bacterial surface,  
109 we characterized surface properties of EcN  $\Delta kfiC$  strain. Phage plaque formation assay confirmed  
110 complete immunity against  $\Phi K1-5$  (Fig. 2c). We also purified and detected bacterial  
111 polysaccharides using sodium dodecyl sulfate–polyacrylamide gel electrophoresis (SDS-PAGE)  
112 followed by CAP staining with alcian blue. Compared to EcN that produced strong staining with  
113 alcian blue at ~180 kDa, EcN  $\Delta kfiC$  produced no visible band (Supplementary Fig. 3a). We next  
114 characterized the morphological changes in bacterial surface using transmission electron  
115 microscopy (TEM) with ruthenium red staining. CAP was visible as an ~80 nm thick layer of  
116 polysaccharides coating outside of the cellular membrane. In contrast, EcN  $\Delta kfiC$  had diminished  
117 size of the polysaccharides layer at ~40 nm (Fig. 2d, Supplementary Fig. 3a,b). We then  
118 investigated capability of CAP to protect cells from wide range of antimicrobial factors. In addition  
119 to the modified sensitivity to human whole blood and bacteriophage, EcN  $\Delta kfiC$  demonstrated a  
120 significant reduction in cellular protection against panels of antibiotics (spectinomycin, ampicillin,  
121 gentamicin, kanamycin, streptomycin) and extreme acids (pH 2.5) compared to EcN  
122 (Supplementary Fig. 4a-i). Finally, we evaluated general applicability of the approach in other  
123 CAP systems. We deleted homologous genes in different *E. coli* strains expressing K1 and K5  
124 CAP (*neuC* and *kfiC*, respectively) and showed alteration in environmental sensitivity  
125 (Supplementary Fig. 5a-c). Together, these results demonstrate that loss of CAP modifies cellular  
126 surface structure and protection against antimicrobial factors.

### 127 128 **Construction of tunable and reversible programmable CAP**

129 We next constructed a programmable CAP system that can sense and respond to induction  
130 stimuli and modulate cell surface properties. We cloned *kfiC* under the control of the *tac* promoter,  
131 which can be activated with the small-molecule inducer isopropyl-b-D-thiogalactopyranoside  
132 (IPTG) (Fig. 3a). Since the EcN genome encodes for constitutive *lacI* expression, we built a small  
133 library of plasmids with various copy numbers of *kfiC* to optimize for tight regulation of CAP  
134 production. EcN  $\Delta kfiC$  transformed with the low (*sc101* origin) copy number plasmid exhibited  
135 complete immunity against  $\Phi K1-5$  (Supplementary Fig. 6a), indicating tight repression at the basal  
136 level. Induction with IPTG rescued the phage sensitivity (Supplementary Fig. 6b), confirming  
137 inducible modulation of CAP on cellular surface.

138  
139 We examined tunability of this inducible CAP (iCAP) system by characterizing multiple induction  
140 conditions. SDS-PAGE showed increase in CAP production from EcN carrying the iCAP system  
141 (EcN iCAP) when incubated with elevating levels of IPTG (Fig. 3b). Co-incubation with  $\Phi K1-5$   
142 also showed decreasing viability of EcN iCAP with elevating levels of IPTG (Supplementary Fig.  
143 6c). We next used TEM to investigate the effect of the iCAP system on cell surface morphology  
144 (Fig. 3d). Increasing levels of IPTG shifted the mean bacterial membrane thickness from 44 nm  
145 to 81 nm, confirming tunable capability of the system. Intermediate iCAP activation at 100 nM  
146 revealed a bimodal distribution of the membrane thickness, suggesting that *kfiC* regulates the  
147 production level but not the length of the polysaccharide polymers. This result agreed with SDS-  
148 PAGE data that showed no difference in migration of CAP band depending on IPTG concentration  
149 (Fig. 3b).

150  
151 We subsequently evaluated the dynamics of production and recovery of the iCAP system using  
152 a similar approach. Upon addition of IPTG, elevated CAP production was observed over time on  
153 SDS-PAGE, reaching near-maximum levels by 4 hours (Fig. 3c). Similarly, removal of IPTG

154 resulted in gradual decrease in CAP until complete repression by 6 hours. We also tested iCAP  
155 dynamics via co-incubation with  $\Phi$ K1-5. While uninduced EcN iCAP grew, induction with IPTG at  
156 the start of co-incubation resulted in a rapid lysis event at 3.5 hours (Supplementary Fig. 6d),  
157 demonstrating delayed CAP production with similar kinetics observed in SDS-PAGE. Collectively,  
158 these data highlight the programmable capability of CAP modulation on the bacterial surface.  
159

### 160 **Programmable protection from host immunity**

161 To build towards utilization of the programmable CAP system for therapeutic applications *in vivo*,  
162 we first tested the ability to exogenously control bacterial viability in human whole blood containing  
163 functional host bactericidal factors *in vitro*. Upon IPTG induction, we observed increased EcN  
164 iCAP survival compared to non-induced control (Fig. 4a). Increasing IPTG levels improved  
165 bacterial survival over a range of at least  $\sim 10^5$  fold, highlighting the tunable capability of the  
166 system. Since iCAP deactivation was observed after removing the inducer, we tracked bacterial  
167 survival over time after transiently activating EcN iCAP at varying IPTG concentration. We were  
168 able to modulate the rate of bacterial clearance from blood by titrating levels of IPTG (Fig. 4b).  
169 Wildtype EcN persisted for >6 hours, while EcN  $\Delta kfiC$  quickly decreased to the levels under the  
170 limit of detection (LOD  $\sim 10^2$  CFU/mL) within the first 0.5 hour. A protective role of CAP in mouse  
171 whole blood was also observed (Supplementary Fig. 7a,b).  
172

173 Autonomous systems that repress CAP expression upon sensing of specific conditions would be  
174 highly useful to clear bacteria and ensure safety. As a proof of principle, we constructed genetic  
175 circuits capable of sensing (1) bacterial overgrowth at colonized sites, and (2) acidosis associated  
176 with sepsis<sup>35</sup> to prevent systemic bacterial growth and inflammation. For both CAP systems, we  
177 placed *kfiC* under the control of *tac* promoter on the high (ColE1 origin) copy number plasmid to  
178 express CAP despite endogenous *lacI* expression. To design a CAP system responsive to  
179 bacterial overgrowth, we incorporated a quorum-sensing module where bacteria express *luxI*  
180 gene to produce diffusible small molecule N-Acyl homoserine lactone (AHL). Upon reaching  
181 critical population density, the AHL-sensing *pluxI* promoter drives expression of *lacI*, repressing  
182 CAP production (Fig. 4c). We cultured the bacteria to stationary phase in LB media to simulate  
183 bacterial overgrowth, and observed that this quorum-sensing CAP (qCAP) system resulted in  
184 bacterial immunity against  $\Phi$ K1-5. Control strains harboring a mutated *luxI* gene<sup>36</sup> were sensitive  
185 to the phage, and exogenous addition of AHL molecule rescued bacterial immunity  
186 (Supplementary Fig. 8a), confirming CAP repression via quorum-sensing circuit. To test the safety  
187 feature of the system, we inoculated the bacteria in human whole blood. Rapid elimination of the  
188 qCAP strain was observed after 2 hours while the control strain persisted (Fig. 4c), indicating  
189 bacterial overgrowth sensitizes bacteria to immune clearance via qCAP. To sense acidosis, we  
190 utilized a previously characterized pH-sensitive promoter pCadC. Membrane tethered  
191 endogenous CadC protein is cleaved to activate pCadC promoter in an acidic environment which  
192 drives expression of *lacI* to repress CAP production (Fig. 4d). While the bacteria carrying this  
193 acidosis-sensing CAP (aCAP) system were sensitive to  $\Phi$ K1-5 in a physiologically neutral  
194 condition (pH 7.4), they were able to grow in the presence of  $\Phi$ K1-5 in a pH level similar to severe  
195 acidosis<sup>37,38</sup> (pH 6.8) (Supplementary Fig. 8b), indicating CAP repression upon sensing acidity.  
196 When the aCAP strain was inoculated in human whole blood, we observed decreased levels of  
197 bacteria in acidic condition (Fig. 4d, Supplementary Fig. 8c). These genetic circuits highlight  
198 exogenous and autonomous control over bacterial CAP expression, allowing for programmable  
199 bacteria sensitivity to host immune detection to enhance safety.  
200

201 To investigate the effect of the programmable CAP system on bacterial interaction with individual  
202 immune factors within whole blood, we assessed how CAP alterations modulated macrophage-  
203 mediated phagocytosis and complement-mediated killing. To study phagocytosis, we incubated  
204 EcN with murine bone marrow-derived macrophages. iCAP activation prior to co-incubation with

205 macrophages resulted in reduction in uptake of bacteria within macrophages compared to basal  
206 control (Supplementary Fig. 9a,b), demonstrating controllable protection from cellular immune  
207 recognition. Bacterial colony counting of macrophage lysates and fluorescence microscopy  
208 imaging confirmed ~10-fold less phagocytosis with bacteria induced with IPTG compared to  
209 uninduced control (Fig. 4e). To assess inflammatory response by the phagocytes, we co-cultured  
210 EcN with THP-1 human monocytic cells and measured levels of TNF $\alpha$ , a major cytokine produced  
211 in response to microbial detection. Presence of CAP reduced levels of TNF $\alpha$  (Fig. 4f), indicating  
212 the ability of CAP to mask microbial recognition from the immune system. To study protection  
213 against circulating host antimicrobials such as the complement system, we exposed EcN to  
214 human plasma. Presence of CAP improved bacterial survival by at least ~10<sup>5</sup> fold (Supplementary  
215 Fig. 10), demonstrating that CAP protects bacteria from soluble host bactericidal factors. Together,  
216 these findings suggest the potential utility of the programmable CAP system to modulates a  
217 multitude of host-microbe interactions *in vivo*.  
218

### 219 ***Transient CAP improves safety and efficacy of engineered probiotic therapy***

220 Intravenous (i.v.) delivery of bacteria allows access to various disease sites in the body; however,  
221 systemic delivery of bacteria remains challenging because (1) rapid clearance by the host immune  
222 system requires increased dosing, while (2) failure in bacteria clearance can lead to bacteremia  
223 and sepsis. Since the programmable CAP system allowed temporal control over bacterial  
224 protection and immunogenicity, we sought to improve bacterial delivery by initially protecting  
225 bacteria during the delivery stage via CAP production, and subsequently allowing CAP decay to  
226 clear them and ensure safety. To study the protective role of CAP *in vivo*, we first characterized  
227 probiotic bioavailability and host health in mouse models (Fig. 5a). Upon i.v. administration of EcN  
228  $\Delta kfiC$ , viable bacteria in blood circulation quickly dropped below the LOD (200 CFU/mL). In  
229 contrast, EcN remained detectable during the first 4 hours (Supplementary Fig. 11a),  
230 demonstrating the protective function of CAP *in vivo*. To examine the host response to  
231 encapsulated (*i.e.*, wild type) vs. unencapsulated (*i.e.*,  $\Delta kfiC$ ) EcN, we measured levels of serum  
232 TNF $\alpha$  and total white blood cell count. We detected lower levels of serum TNF $\alpha$  in the first hour  
233 of EcN injection compared to EcN  $\Delta kfiC$  injection (Fig. 5b), similar to the decreased TNF $\alpha$   
234 response observed in our *in vitro* assay. This short-term inflammatory response was resolved  
235 within 24 hours for both bacterial strains. In contrast to the rapid resolution of TNF $\alpha$  response, we  
236 detected elevated total white blood cell count after 24 hours of injection at higher level with EcN  
237 compared to EcN  $\Delta kfiC$  (Supplementary Fig. 11b). Neutrophil expansion accounted for the  
238 majority of the immune response to encapsulated EcN (Fig. 5b), suggesting that the persistence  
239 of CAP-expressing EcN poses a risk of prolonged bacteremia, which may result in systemic  
240 inflammation and toxicity. Thus, while CAP can improve bioavailability, static protection may lead  
241 to prolonged bacterial circulation in blood and pose toxicity risks.  
242

243 We hypothesized that transient activation of the programmable CAP system can improve bacterial  
244 delivery profiles by modulating maximum injectable dose, host toxicity, and biodistribution.  
245 Inducing CAP expression prior to injection would improve bioavailability and mask cytokine  
246 induction, and loss of CAP in the absence of the inducer *in vivo* would effectively clear bacteria  
247 and minimize long-term immune responses. To test this strategy, we first i.v. administered  
248 escalating doses of EcN iCAP and assessed host health and determined maximum tolerable  
249 dose<sup>39,40</sup> (MTD) (Fig. 5c). At lower doses, EcN iCAP caused a smaller decrease in body weight  
250 compared to EcN and EcN  $\Delta kfiC$  with static cellular surface (*i.e.*, with or without CAP, respectively)  
251 (Supplementary Fig. 12a,b). Importantly, EcN iCAP dramatically reduced toxicity compared to  
252 EcN and EcN  $\Delta kfiC$  at higher doses: EcN and EcN  $\Delta kfiC$  caused severe end-point toxicity (death  
253 or >15% loss of weight) to mice treated with doses above 1 $\times$ 10<sup>7</sup> CFU within 2 days, while no mice  
254 showed severe toxicity following injection of pre-induced EcN iCAP at the same doses (Fig. 5d).  
255 Based on these data, we computed a dose-toxicity curve and demonstrated that transiently

256 induced EcN iCAP results in ~10-fold higher MTD compared to EcN and EcN  $\Delta kfiC$  (Fig. 5e). To  
257 further study safety, we simulated a severe toxicity scenario by inducing sepsis by intraperitoneal  
258 injection of bacteria<sup>41</sup>. At both high and low doses ( $10^7$  and  $10^6$  CFU, respectively), we consistently  
259 observed improved safety for EcN iCAP compared to EcN and EcN  $\Delta kfiC$  (Supplementary Fig.  
260 13a,b). Finally, to study bacteria biodistribution, we administered all groups of EcN at a matched  
261 dose of  $5 \times 10^6$  CFU via i.v. injection. Approximately 10-fold less EcN and EcN iCAP were found in  
262 peripheral organs (liver and spleen) compared to EcN  $\Delta kfiC$  (Supplementary Fig. 14), indicating  
263 that initial induction of EcN iCAP was sufficient to provide protection from the mononuclear  
264 phagocyte system. These data support that transient activation of iCAP improves probiotic  
265 delivery and safety.

266  
267 Since systemic bacterial delivery has been extensively used for cancer therapy, we next tested  
268 whether the programmable CAP system can improve antitumor efficacy by permitting higher  
269 doses (Fig. 5f). To engineer bacteria to deliver antitumor payloads, we cloned a gene encoding  
270 pore-forming toxin, theta toxin (TT), previously shown to be effective as a bacterial cancer  
271 therapy<sup>42</sup>, in a high copy number plasmid (ColE1) with a stabilization mechanism for *in vivo*  
272 applications (Axe/Txe system<sup>43</sup>). In a syngeneic CT26 colorectal cancer model, we intravenously  
273 administered engineered EcN at the corresponding MTD of each strain (EcN, EcN  $\Delta kfiC$ , and EcN  
274 iCAP at  $5 \times 10^6$ ,  $1 \times 10^7$ , and  $5 \times 10^7$  CFU, respectively), along with a low dose of EcN iCAP at  $5 \times 10^6$   
275 CFU to match the MTD of EcN. Over the following days, bacterial accumulation in tumors was  
276 observed by luminescence. Here, EcN iCAP MTD showed significantly higher signals in tumors  
277 compared to all other groups (Fig. 5g). After bacterial administration, we observed that mice  
278 treated with EcN MTD, EcN  $\Delta kfiC$  MTD, and low dose EcN iCAP exhibited modest tumor growth  
279 suppression compared to untreated group over 14 days. By contrast, single administration of EcN  
280 iCAP MTD resulted in significant tumor growth suppression by ~400% compared to the untreated  
281 group (Fig. 5h). While increased MTD enabled by transient activation of the iCAP system  
282 improved therapeutic efficacy, body weight of animals between MTD groups remained similar  
283 (Supplementary Fig. 15). We next compared efficacy of TT-producing EcN and EcN iCAP at MTD  
284 in a genetically engineered spontaneous breast cancer model (MMTV-PyMT). EcN iCAP MTD  
285 resulted in improved tumor growth suppression by ~100% compared to EcN MTD over 14 days  
286 (Fig. 5i). Consistently, we observed higher bacterial signal in tumor from EcN iCAP compared to  
287 EcN while body weight remains similar between the two treatment groups (Supplementary Fig.  
288 16). To further explore the role of CAP on bacterial delivery to tumors *in vivo*, we built a  
289 mathematical bacterial pharmacokinetics model. Our simulations suggested transient protection  
290 of bacteria using the iCAP system could improve tumor specificity by minimizing persistence in  
291 peripheral organs (*i.e.*, blood and liver), supporting our experimental observations  
292 (Supplementary Fig. 17a). As a result, this approach allows for elevated bacterial doses, which  
293 leads to increased tumor accumulation upon injection. Taken together, the iCAP system enables  
294 increased tolerable bacterial doses and improved therapeutic efficacy.

### 295 296 ***In situ* CAP activation translocates EcN to distal tumors**

297 Intratumoral (i.t.) bacteria injection has been used as a route of delivery in clinical settings due to  
298 higher therapeutic efficacy, dose titration capability, and improved safety profiles compared to  
299 systemic injection<sup>44-48</sup>. One unique capability of i.t. delivery is the translocation of bacteria from  
300 injected tumors to distal tumors<sup>48</sup>, potentiating a novel route of safe bacterial delivery to  
301 inaccessible tumors. However, continuous translocation coupled with long-term survival of  
302 bacteria can pose a significant safety concern; thus transient *in situ* activation could allow for more  
303 optimal utilization of this phenomena. To model this hypothesis, we simulated i.t. delivery and  
304 showed that *in situ* induction of EcN iCAP within the tumor increases bacterial bioavailability in  
305 circulation and facilitates bacterial translocation to distal tumors (Fig. 6a, Supplementary Fig. 17b).  
306 We then tested this strategy via i.t. injection of uninduced EcN iCAP (*i.e.*, without CAP) into a

307 single tumor of mice harboring dual hind-flank CT26 tumors (Fig. 6b). To activate the iCAP system  
308 *in situ*, mice were fed with water containing IPTG. After 3 days, we observed a marked increase  
309 in bacterial translocation to distal tumors compared to uninduced bacteria (Fig. 6c, Supplementary  
310 Fig. 18a,b). Biodistribution data showed tumor-specific translocation (Fig. 6d, Supplementary Fig.  
311 18c), and mice exhibited minimal reductions in body weight (Supplementary Fig. 18d). Tracing  
312 colonization kinetics using bioluminescent EcN confirmed the appearance of bacteria in distal  
313 tumor 1 day following IPTG administration (Supplementary Fig. 19a). We next explored whether  
314 this bacterial trafficking approach can be generalized in multiple clinically-relevant animal models.  
315 We tested orthotopic breast cancer (mammary fat-pad 4T1) and MMTV-PyMT mouse models.  
316 Consistently, we observed increased bacterial translocation to distal tumors via *in situ* activation  
317 of iCAP in both tumor models (Fig. 6c, Supplementary Fig. 1b,c, Supplementary Fig. 20a-c,  
318 Supplementary Fig. 21a-c). Notably, i.t. injection of EcN iCAP into a single tumor in the MMTV-  
319 PyMT model resulted in microbial translocation to multiple distal tumors throughout the body  
320 following IPTG induction. These results demonstrate the robustness of iCAP-mediated  
321 translocation across a range of locations and tumor types.

322  
323 We next delivered therapeutics to tumors using engineered EcN expressing the antitumor TT  
324 payload. TT was cloned under the *luxI* promoter that is responsive to an inducer molecule AHL  
325 orthogonal to IPTG (Fig. 6e). Following i.t. injection of therapeutic EcN into a single tumor in the  
326 CT26 dual flank mouse model, translocation to uninjected tumors was controlled by feeding mice  
327 with or without IPTG water. Another group of mice were given i.t. injection of EcN iCAP without  
328 TT as non-therapeutic control. iCAP-mediated bacterial translocation was confirmed by bacterial  
329 bioluminescence (Supplementary Fig. 22a-c). Subsequently, AHL was administered  
330 subcutaneously to induce TT expression, and tumor growth was monitored. While PBS treatment  
331 allowed tumor growth of ~400%, a reduction in the growth of tumors were observed when they  
332 were directly injected with therapeutic EcN regardless of bacterial translocation. By contrast,  
333 therapeutic efficacy in distal (uninjected) tumors was only observed when the mice were fed with  
334 IPTG water followed by TT induction via subcutaneous injection of AHL (Fig. 6f, Supplementary  
335 Fig. 23), demonstrating successful therapeutic delivery to distal tumors using the iCAP-mediated  
336 bacterial translocation approach. Body weight quickly recovered to baseline within a few days  
337 post administration for all conditions (Supplementary Fig. 24). Together, we provide a  
338 demonstration of controllably translocating therapeutic bacteria and utilizing this strategy to treat  
339 distal tumors *in vivo*.

## 340 341 **Conclusion**

342 We have demonstrated a synthetic biology approach for dynamic and tunable modulation of the  
343 bacterial surface in the context of *in vivo* therapeutic delivery. Several biosensing circuits were  
344 designed to allow for exogenous and autonomous regulation of CAP expression, which were  
345 shown to enhance both safety and efficacy in multiple therapeutically-relevant scenarios. Taking  
346 advantage of the natural evolution of the CAP system to interface with a multitude of environments,  
347 we showed engineered bacterial interactions with host immunity, bacteriophage, antimicrobials  
348 and acidity. Though we have explored the modulation of CAP density via *kfiC* in this study,  
349 additional genes identified through our sRNA screen may also be used to achieve varied  
350 sensitivities or to independently alter bacterial sensitivity to various environmental factors. For  
351 example, *kfiB* and *kfiC* genes have been reported to differentially modulate bacterial interactions  
352 with epithelial cells<sup>29</sup>. We have also shown that this approach can be applied to other strains of *E.*  
353 *coli*. Since there exists over 80 distinct *E. coli* CAP systems<sup>24,31</sup> and many more in other species,  
354 we envision CAP engineering to possess vast opportunities to controllably modulate microbial  
355 surface properties for therapeutic delivery.

356

357 Despite recent preclinical progress with bacterial therapies, dose-limiting toxicity has been a long-  
358 standing challenge, slowing efforts for clinical translation. Early works by William Coley in the 19<sup>th</sup>  
359 century had observed tumor regression upon injections of a live bacterial cocktail<sup>49</sup>, but this  
360 approach was largely unsafe due to potential risks of infections and inflammatory side effects.  
361 More recently, several clinical trials using genetically attenuated bacterial strains observed dose-  
362 limiting toxicities. For example, systemic administration of attenuated *Salmonella typhimurium*  
363 strain (VNP20009) at or higher than tolerable dose led to tumor colonization in < 20% of patients,  
364 and resulted in no objective regression in a phase I clinical trial<sup>11</sup>. While the recent focus of  
365 synthetic biology has been the engineering of various therapeutic payloads to increase efficacy,  
366 strategies to improve bacterial delivery has been limited. We utilized on-demand CAP system to  
367 controllably protect probiotic EcN from immune clearance, and demonstrated an ~10-fold  
368 increase in the systemically injectable tolerated dose *in vivo*. As a result, transient expression of  
369 CAP was able to safely enhance bacterial delivery and suppress rapidly growing syngeneic  
370 colorectal tumors with a single i.v. administration. Given that humans are 250-fold more sensitive  
371 to endotoxins compared to mice<sup>50</sup>, we expect our results to have important implications in the  
372 clinical translation of bacterial therapies. Since the CAP system is orthogonal to other bacterial  
373 surface structures such as LPS, phospholipids, and flagellum<sup>51</sup>, synergistic combinations of these  
374 systems could further improve the programmability and immunogenicity of bacterial therapy, and  
375 warrant future investigation.

376  
377 We further devised the programmable CAP system to facilitate translocation of bacteria to distal  
378 tumors, demonstrating a novel delivery strategy with advantageous safety profiles. Comparing  
379 across different tumor types, we noted leakier translocation of bacteria in 4T1 and PyMT-MMTV  
380 models, suggesting tumor type, location, or vascularization may play a role in bacterial escape  
381 from the tumor microenvironment. Regardless, *in situ* activation of the programmable CAP system  
382 opens the possibility of utilizing programmable translocation of therapeutic bacteria to  
383 inaccessible disease sites including metastatic tumors. Transient *in situ* activation could allow for  
384 colonization of newly formed tumors with reduced accessibility. As humans are more sensitive  
385 to bacteria compared to mice, we expect that the programmable CAP system will be far more  
386 effective in human than mice at controlling bioavailability of bacteria in circulation. In addition, the  
387 ability to transiently increase circulating bacteria from colonized tumor may allow safe sampling  
388 of bacteria without the need for an invasive tumor biopsy while preventing excessive leakage of  
389 bacteria that could cause bacteremia and systemic infection. More broadly, we envision that *in*  
390 *situ* control over bacterial CAP may be utilized to provide further safeguards during bacterial  
391 therapy such as sensitization of bacteria with antibiotics<sup>52,53</sup> and phage therapy<sup>54</sup>.

392  
393 In addition to clear applications within bacteria cancer therapy, the utility of the programmable  
394 CAP system can be extended to other clinical settings. For example, we showed that CAP  
395 provides protection from acids which could potentially protect orally-delivered probiotics during  
396 transit through the gastric environment and facilitate intestinal colonization<sup>55</sup>. Beyond delivery,  
397 altering surface immunogenicity may also be utilized therapeutically to modulate the host immune  
398 landscape in the tumors and gut<sup>56,57</sup>. The platform described here could also be used as a model  
399 system to study the role of CAP and other surface structures on pathogen colonization in the host  
400 environment<sup>58,59</sup>. Aside from model systems and clinical applications, the programmable CAP  
401 system may provide a general platform for a programmable interface with various environments.  
402 As microbial deployment in various applications continue to advance, robust control over microbial  
403 interaction with complex surroundings will ensure safe and effective implementation of engineered  
404 microbes.

405



## Programmable Encapsulation

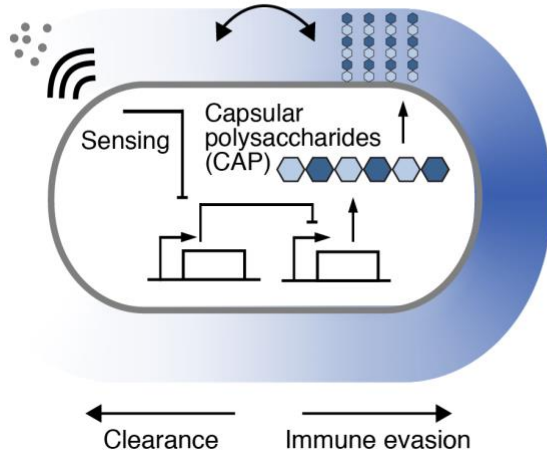

## Enhanced Probiotic Delivery

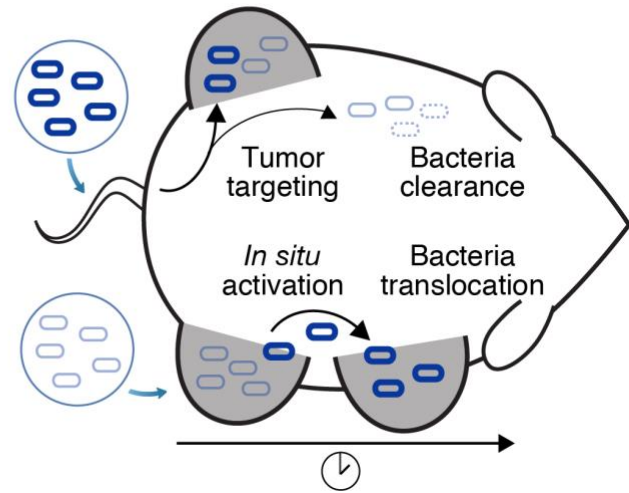

406  
407  
408  
409  
410  
411  
412  
413  
414  
415  
416  
417

**Figure 1: Programmable capsular polysaccharides (CAP) system for control over bacterial encapsulation and *in vivo* delivery profiles.** We engineered the biosynthetic pathway of bacterial CAP for tunable and dynamic surface modulation of the probiotic *E. coli* Nissle 1917 with synthetic gene circuits. The CAP system modulates bacterial immunogenicity and survivability *in vivo*. By balancing these factors, the programmable CAP system is capable of reducing toxicity related to systemic bacterial administration and enables inducible bacterial translocation between tumors.

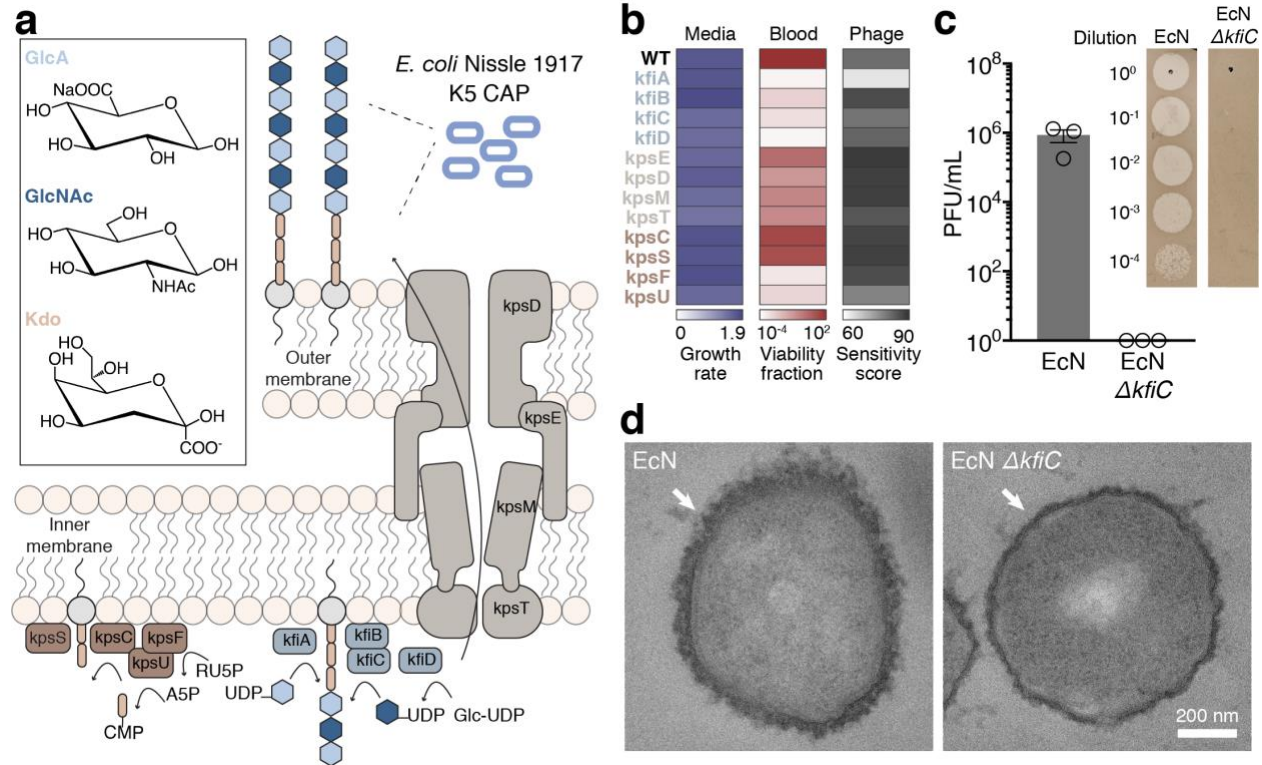

418  
419  
420  
421  
422  
423  
424  
425  
426  
427  
428  
429  
430  
431  
432  
433  
434

**Figure 2: sRNA knockdown screen identifies key genes in capsular polysaccharides (CAP) biosynthesis.** **a**, Schematics of K5 CAP biosynthesis in EcN. CAP is composed of an alternating polymer chain of GlcA and GlcNAc connected to a poly-KDO linker. Subsequently CAP is transported from the inner bacteria membrane to the outer membrane. **b**, Quantification of microbial growth parameters of EcN knockdown (KD) strains in nutrient, blood, or phage containing media. Growth rate denotes maximum specific growth rate ( $\text{hour}^{-1}$ ) obtained by fitting growth curve to measured OD600 over time. Blood viability is defined as fraction of bacterial CFU after 6 hours incubation in human blood over inoculated bacterial CFU. Phage sensitivity is calculated by area under the curve of bacterial turbidity over 6 hours of incubation with LB media containing  $\Phi$ K1-5. **c**, Phage sensitivity of EcN and EcN  $\Delta kfiC$ . Plaque forming assay demonstrates complete absence of infection and lysis in EcN  $\Delta kfiC$ . The representative images show difference between serially-diluted plaque forming units (PFU) of bacteria with and without CAP. **d**, TEM images showing CAP encapsulation of the cellular outer surface. *kfiC* knockout results in the absence of CAP nanostructure on the cell surface of EcN  $\Delta kfiC$ . White arrows indicate cell surface.

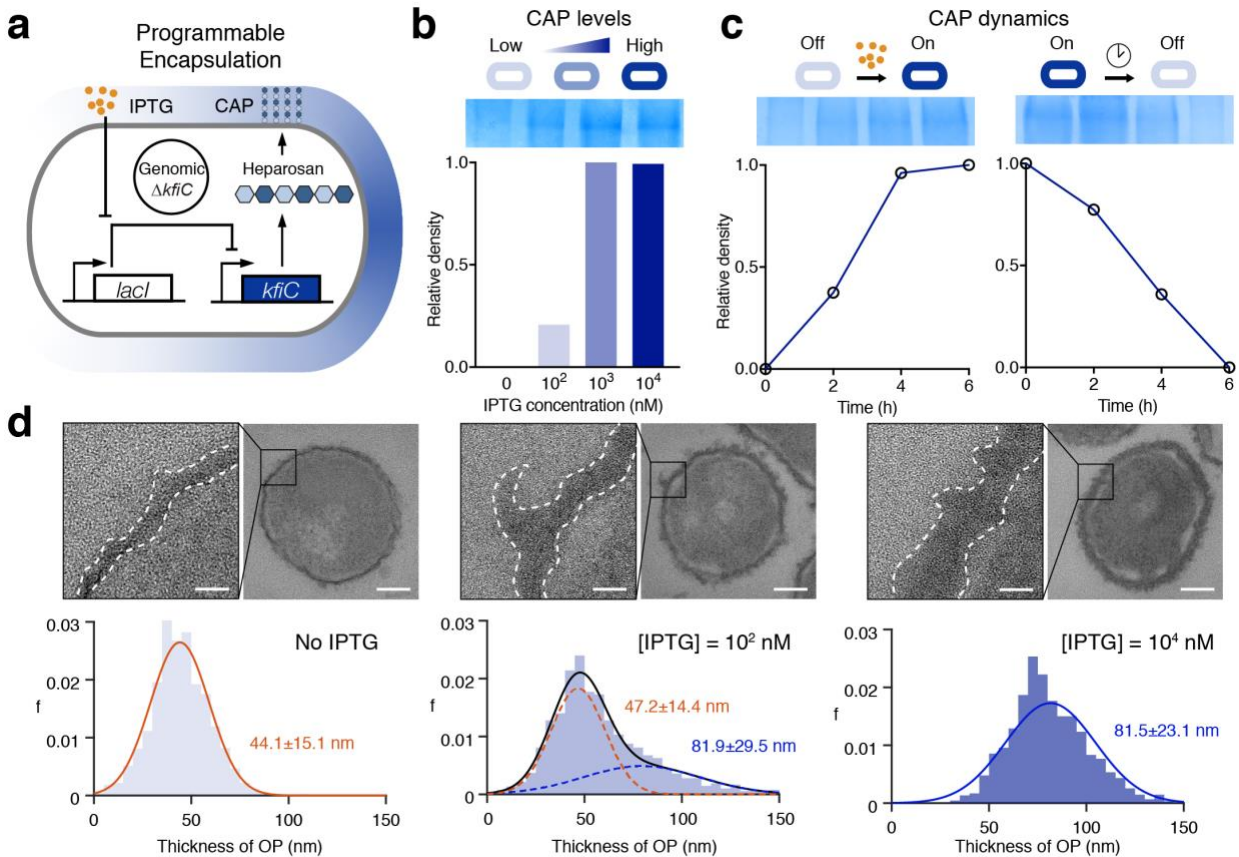

435  
436  
437  
438  
439  
440  
441  
442  
443  
444  
445  
446  
447  
448  
449  
450  
451  
452  
453

**Figure 3: Design and characterization of the inducible capsular polysaccharides (iCAP) system.** **a**, Inducible gene circuit diagram whereby the *kfiC* gene was cloned under the control of a *lac* promoter to allow inducible CAP expression via the small molecule IPTG. Copy number of the *kfiC* gene was modified to minimize basal *kfiC* expression. **b**, SDS-PAGE gel stained with Alcian blue showed elevating levels of CAP production corresponding to the IPTG concentration (top). The densitometric analysis of CAP bands demonstrated that CAP production reaches maximum at approximately 1  $\mu$ M IPTG (bottom). **c**, SDS-page gels and densitometric analysis show CAP kinetics upon induction (left) and decay (right). **d**, Ruthenium red-stained TEM images showing change in CAP in titrating IPTG concentration. Histograms reveal shift in cellular outer layer thickness as IPTG concentration increases. Insets show representative images of bacteria and zoomed outer surface structure. Dotted lines indicate inner (white) and outer (gray) perimeters of CAP. Scale bar is 40 nm (left) or 200 nm (right) in each inset.

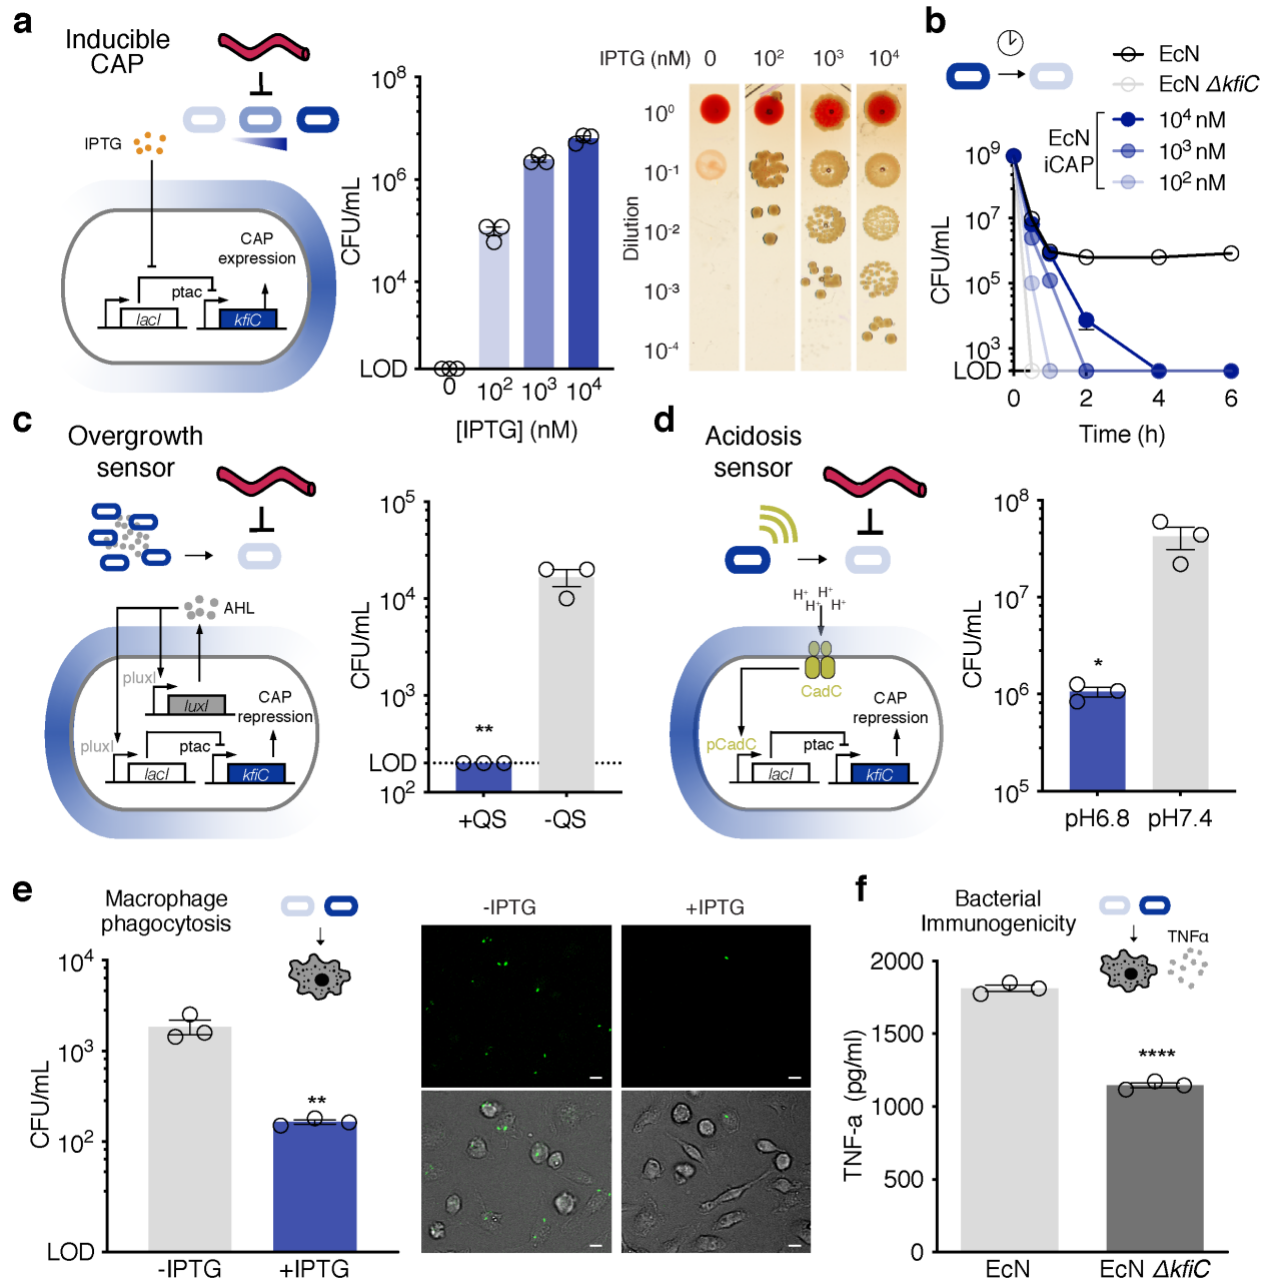

454  
455

456 **Figure 4: Tunable interaction of the programmable capsular polysaccharides (CAP) system**  
 457 **with host immune factors.** **a**, Elevating levels of CAP activation with IPTG enabled  
 458 corresponding increase in bacterial survival in human whole blood (left). Representative images  
 459 of bacteria spotted on LB-agar plate after 1 hour incubation in human whole blood (right). **b**,  
 460 Survival kinetics using varying levels of IPTG induction prior to incubation with human whole blood.  
 461 LOD at 2x10<sup>2</sup> CFU/mL. **c**, Gene circuit diagram for repression of CAP upon sensing bacterial  
 462 overgrowth (left). Quorum sensing (QS) *luxI* gene produces diffusible AHL molecules which  
 463 activates the *pluxI* promoters. *lacI* gene is placed under the control of *pluxI* promoter, repressing  
 464 *kfiC* expression upon reaching quorum. Reduced bacterial survival was achieved after 2 hours  
 465 inoculation in human whole blood (right; \*\*P = 0.007, unpaired t-test). -QS denotes a control strain  
 466 with mutated *luxI* gene. LOD at 2x10<sup>2</sup> CFU/mL. **d**, Gene circuit diagram for repression of CAP  
 467 upon sensing blood acidosis (left). *lacI* gene is placed under the control of pCadC acid-sensitive

468 promoter, repressing *kfiC* expression upon sensing acidity. Reduced bacterial survival was  
469 achieved 4 hours post inoculation in human whole blood at physiologically relevant neutral  
470 (pH7.4) and acidic (pH6.8) conditions (right; \*P = 0.02, unpaired t-test). **e**, BMDMs were co-  
471 cultured with activated or non-activated bacteria for 30 minutes and lysed to enumerate  
472 phagocytosed bacterial number. The representative fluorescence microscopy images show  
473 decrease in bacteria (GFP, top) in phagocytes (Brightfield, bottom) upon CAP activation (\*\*P =  
474 0.007, unpaired t-test). Scale bar is 10  $\mu$ m. **f**, CAP contribution to immune recognition. ELISA of  
475 TNF $\alpha$  showed a decrease in cytokine production by THP-1 cells incubated with EcN compared to  
476 the cells incubated with EcN  $\Delta kfiC$  (\*\*\*\*P < 0.0001, unpaired t-test). All error bars represent  
477 standard error of mean (SEM) over three independent samples. Limit of detection (LOD) at  $2 \times 10^2$   
478 CFU/mL in all panels.  
479  
480  
481

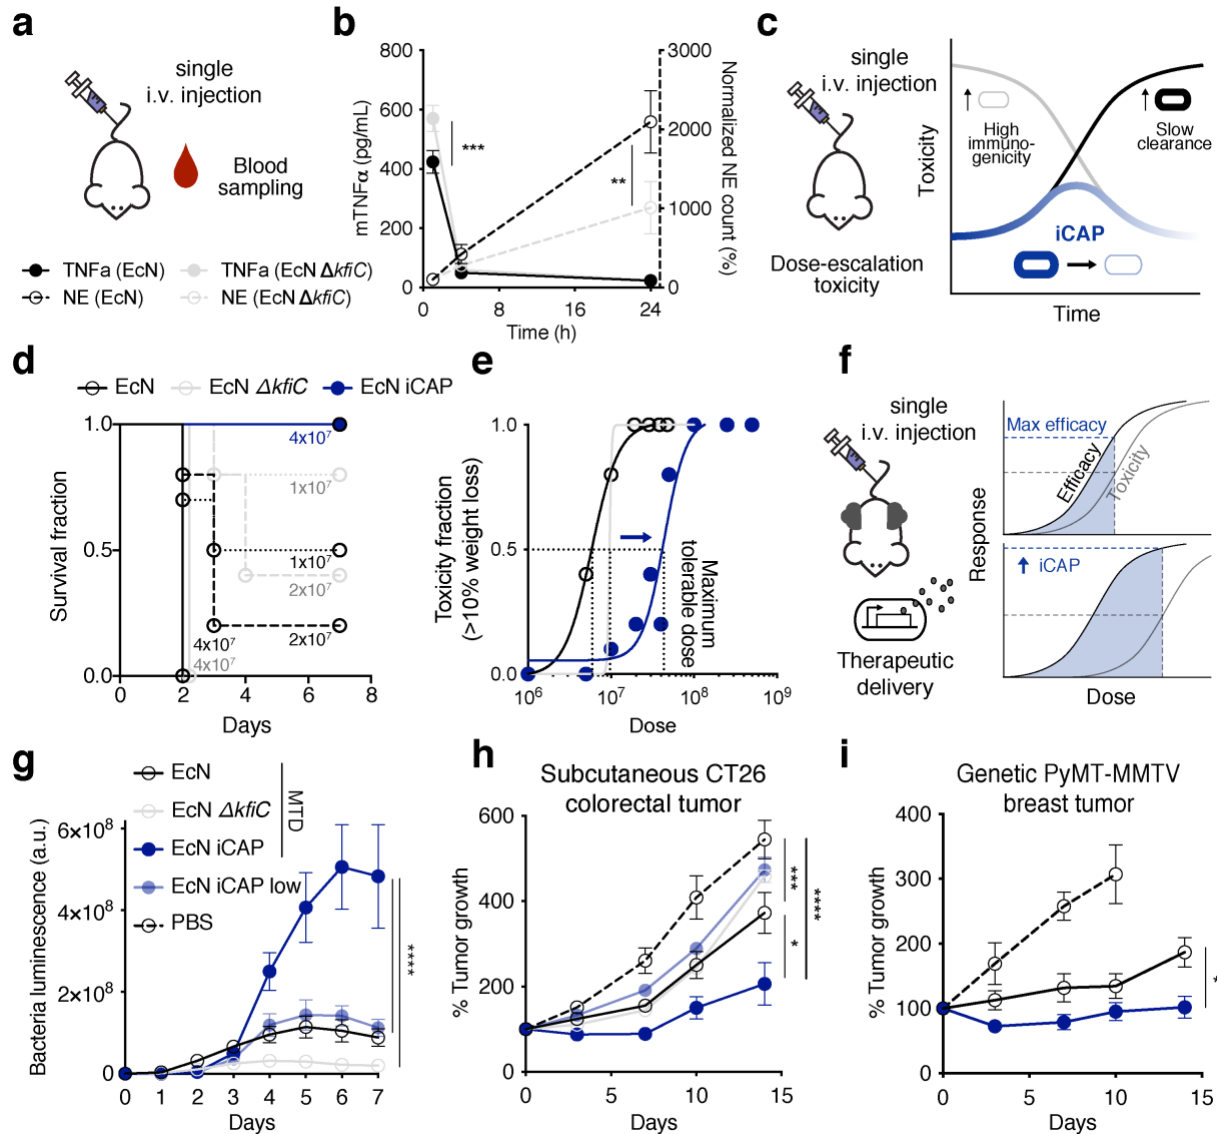

482  
483

484 **Figure 5: Transient capsular polysaccharides (CAP) activation improves systemic**  
 485 **bacterial delivery and efficacy *in vivo*.** **a**, Evaluation of host response after bacterial  
 486 administration.  $5 \times 10^6$  bacteria were systemically delivered to BALB/c mice by i.v. injection, and  
 487 cheek blood was collected at 1, 4, and 24 hours post injection (p.i.). **b**, Change in TNF $\alpha$  levels  
 488 (solid line) and neutrophil count (dotted line) after bacterial injection. EcN induced lower levels of  
 489 initial TNF $\alpha$  spikes compared to EcN  $\Delta kfiC$  ( $***P = 0.0007$ , two-way ANOVA with Sidak's multiple  
 490 comparisons test;  $n = 5$  per group). EcN induced greater levels of neutrophil expansion compared  
 491 to EcN  $\Delta kfiC$ . Difference in neutrophil levels were observed after 24 hours p.i. ( $**P = 0.005$ , two-  
 492 way ANOVA with Sidak's multiple comparisons test;  $n = 5$  per group). **c**, Safety evaluation upon  
 493 i.v. bacteria injection with elevating dosage. BALB/c mice were i.v. administered with EcN iCAP,  
 494 EcN, or EcN  $\Delta kfiC$  at dosage ranging from  $5 \times 10^6$  to  $5 \times 10^8$  CFU. EcN iCAP was pre-induced with  
 495  $10 \mu\text{M}$  IPTG and allowed for gradual attenuation of CAP over time to minimize toxicity. **d**, Survival  
 496 curve after bacterial administration. All animals injected with  $4 \times 10^7$  CFU of EcN or EcN  $\Delta kfiC$   
 497 succumbed within 2 days (>15% body weight reduction). All mice survived after injection with  
 498  $4 \times 10^7$  CFU of EcN iCAP ( $n \geq 5$  mice per group). **e**, Dose-toxicity curve. Transient activation of  
 499 iCAP increased maximum tolerable dose (MTD =  $4.4 \times 10^7$  CFU) compared to EcN ( $5.8 \times 10^6$  CFU)

500 or EcN  $\Delta kfiC$  ( $9.6 \times 10^6$  CFU). MTD was calculated based on TD50 for exhibiting moderate toxicity  
501 (>10% body weight drops p.i.; Nonlinear regression with least squares fit;  $n \geq 5$  per group). **f**,  
502 Therapeutic bacteria administration at MTD to improve antitumor efficacy. Mice bearing tumors  
503 were i.v. injected with EcN MTD, EcN  $\Delta kfiC$  MTD, EcN iCAP MTD (pre-induced with  $10 \mu\text{M}$  IPTG),  
504 or EcN iCAP low (pre-induced with  $10 \mu\text{M}$  IPTG) expressing antitumor theta-toxin at  $5 \times 10^6$ ,  $1 \times 10^7$ ,  
505  $5 \times 10^7$ , or  $5 \times 10^8$  CFU, respectively. **g**, Bacterial growth trajectories in subcutaneous CT26 tumors  
506 after intravenous delivery *in vivo*. Each line represents average of bacterial growth trajectories in  
507 tumors quantified by bacterial luminescence over time for each bacterial strain injected. Mice  
508 injected with EcN iCAP MTD showed higher bacterial luminescence in tumors compared to mice  
509 injected with EcN MTD, EcN  $\Delta kfiC$  MTD, and EcN iCAP low (\*\*\*\*P < 0.0001, Two-way ANOVA  
510 with Turkey's multiple comparison test;  $n = 14, 13, 9,$  and  $13$  tumors, respectively, for EcN MTD,  
511 EcN  $\Delta kfiC$  MTD, EcN iCAP MTD and EcN iCAP low groups). Luminescence values are  
512 normalized to basal luminescence of individual strains. **h**, Therapeutic efficacy measured by  
513 relative tumor size over time in a syngeneic CT26 model. EcN iCAP MTD demonstrated highest  
514 tumor growth suppression (\*\*\*\*P < 0.0001, \*\*\*P = 0.0008, \*\*P = 0.003; two-way ANOVA with  
515 Tukey's multiple comparison test;  $n = 14, 13, 9, 13$  and  $11$  tumors, respectively, for EcN MTD,  
516 EcN  $\Delta kfiC$  MTD, EcN iCAP MTD, EcN iCAP low, and PBS groups). **i**, Therapeutic efficacy  
517 measured by relative tumor size over time in a genetically engineered spontaneous breast cancer  
518 (MMTV-PyMT) mouse model. Tumor growth was measured by calipering three orthotopic regions  
519 in mammary glands (upper left, upper right, and bottom). EcN iCAP MTD demonstrated higher  
520 tumor growth suppression than EcN MTD (\*P = 0.0197; two-way ANOVA;  $n = 15, 15,$  and  $9$  tumors,  
521 respectively, for EcN MTD, EcN iCAP MTD, and PBS groups. Mice in PBS groups reached study  
522 endpoint 10 days p.i.). All error bars represent SEM.

523

524

525

526

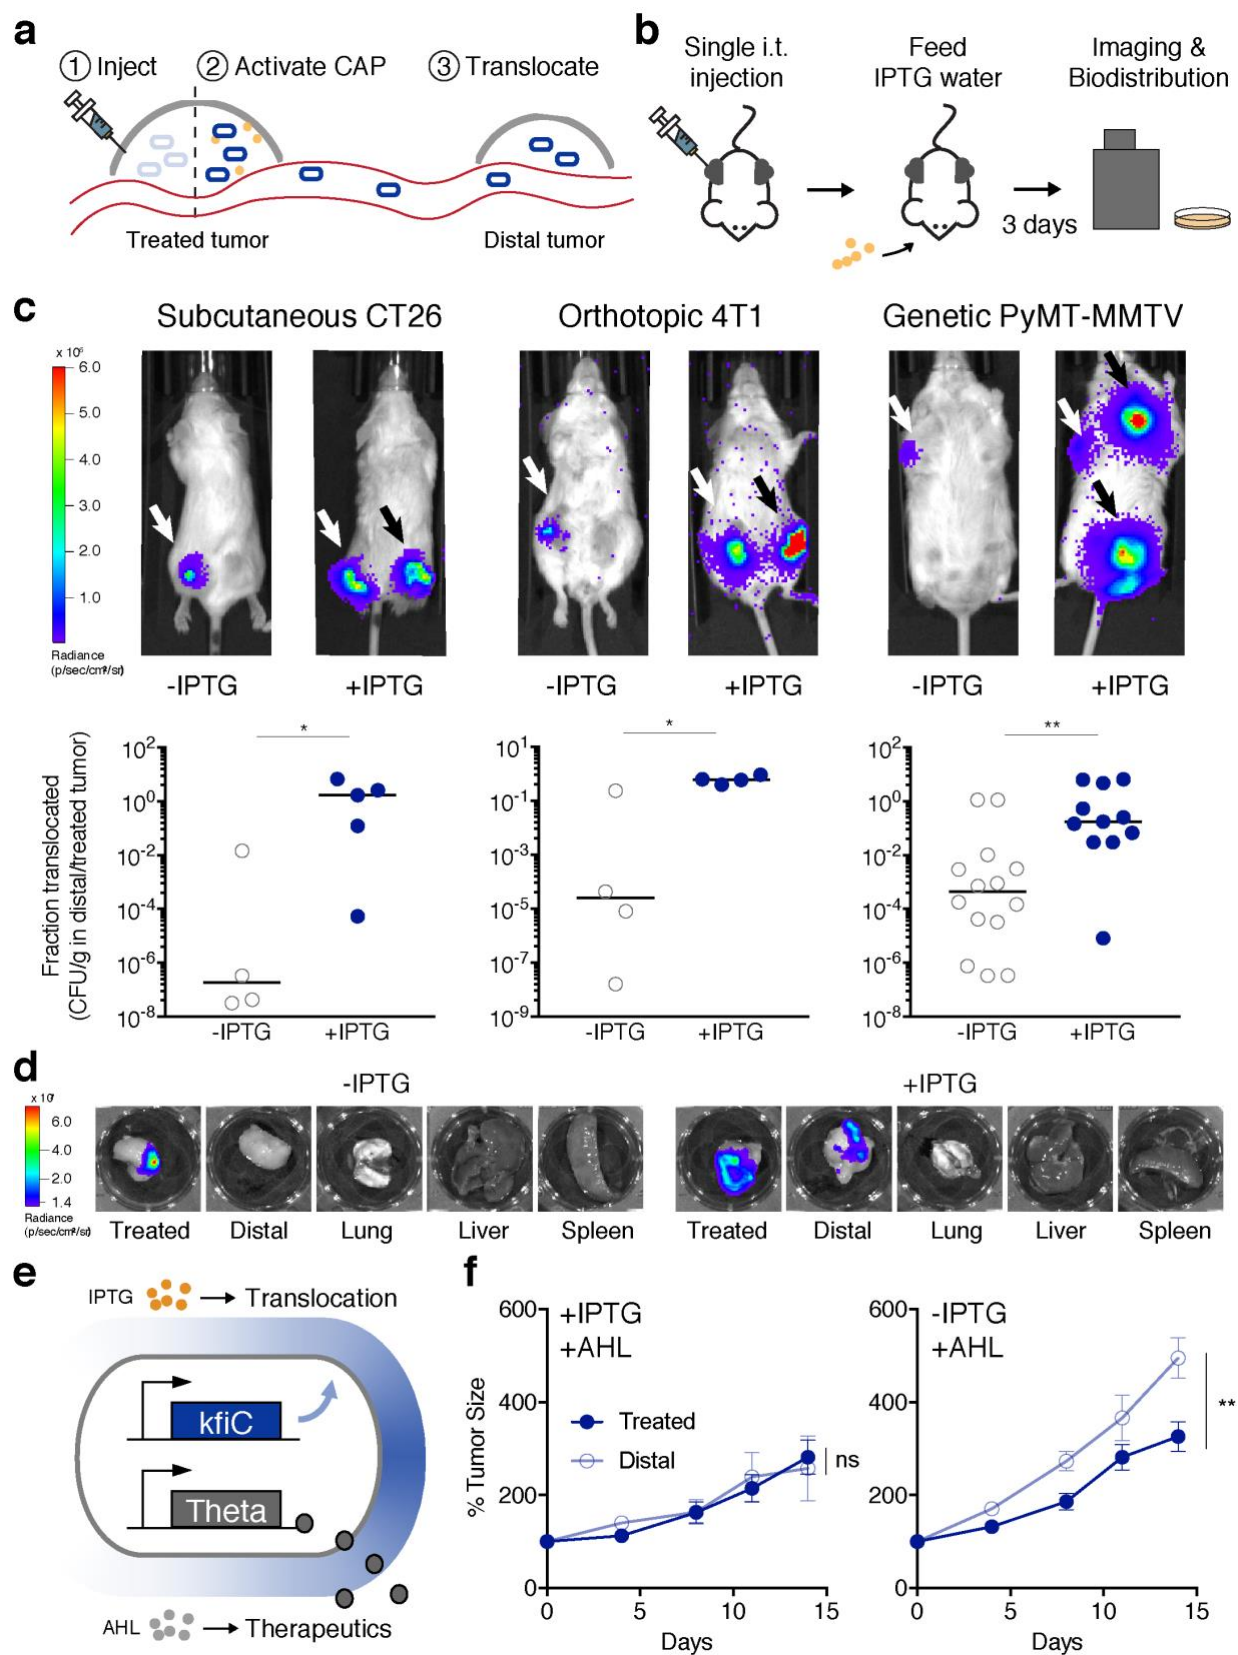

527  
528  
529

**Figure 6: *In situ* activation of the programmable capsular polysaccharides (CAP) enables bacterial translocation and drug delivery to distal tumors. a, Schematics of iCAP-mediated**



530 bacterial translocation. EcN are injected into one tumor (treated tumor). iCAP activation enables  
531 bacteria translocation to distal tumors. **b**, Mice harboring multiple tumors are injected with EcN  
532 iCAP into a single tumor (treated tumor). Subsequently, mice are fed 10 mM IPTG water to  
533 activate iCAP *in situ*. Mice are imaged daily for bacterial bioluminescence to track tumor  
534 colonization in tumors. To quantify bacterial biodistribution, organs are harvested and bacterial  
535 colonies are counted after 3 days. **c**, Inducible translocation of EcN iCAP to distal tumors in CT26  
536 syngeneic (left), 4T1 orthotopic (middle), and MMTV-PyMT genetically engineered (right) mouse  
537 tumor models. Representative IVIS images showing bacterial translocation *in vivo*. White arrows  
538 indicate location of bacterial injection. Black arrows indicate location of bacterial translocation.  
539 Translocation is quantified by fraction of bacteria found in distal tumor compared to treated tumor.  
540 Bacteria number is measured by performing biodistribution for CFU/g enumeration. iCAP  
541 activation showed marked increase in bacterial translocation (\*P = 0.032, \*P = 0.029, \*\*P = 0.003,  
542 Mann-Whitney test). **d**, Representative images of *ex vivo* organ images taken with IVIS showing  
543 bacterial tumor translocation in 4T1 orthotopic mouse model. **e**, Schematics of engineered EcN  
544 capable of programmable translocation and therapeutic expression. Therapeutic production is  
545 externally controlled by an inducer AHL. The engineered EcN was injected into a single tumor  
546 and IPTG-induced to translocate to distal tumors, and AHL-induced to deliver therapeutics. **f**,  
547 Therapeutic efficacy in treated and distal CT26 tumors measured by relative tumor growth over  
548 time. Bacteria were injected into a single treated tumor. The translocation was controlled by IPTG  
549 water. 3 days p.i., AHL was administered to induce therapeutic expression. Distal tumor growth  
550 was suppressed only when therapeutic bacteria were able to translocate (n.s. P = 0.83, \*\*P =  
551 0.004, two-way ANOVA with Bonferroni posttest, n = 6, 5 for both treated and distal tumors,  
552 respectively). All error bars represent SEM.  
553

554 **Acknowledgments:** We thank Dr. Ian Molineux for providing  $\Phi$ K1-5 phage, and K1 and K5 *E.*  
555 *coli* strains. We thank Dr. Kunihiro Uryu at EMSCOPIC for his technical support. **Funding:** This  
556 work was supported by the NIH Pathway to Independence Award (R00CA197649–02), DoD  
557 LC160314 (T.D.), DoD BC160541 (T.D.), NIH R01GM069811 (T.D.), NIH F99CA253756 (T.H.),  
558 and Honjo International Foundation Scholarship (T.H.). **Author contributions:** T.H., J.H., K.L.  
559 and T.D. conceived and designed the study. T.H., J.H., Y.C., J.I., J.Z., F.L., S.C. and C.N.  
560 performed *in vitro* characterization. T.H., J.H., Y.C., C.C., K.G., N.H. and K.P. performed *in vivo*  
561 experiments for this study. T.H., J.H., N.H. and T.D. developed computational modeling for this  
562 study. T.H., J.H., N.A., K.L. and T.D. wrote the manuscript. **Competing interests:** T.H., J.H., K.L.  
563 and T.D. have filed a provisional patent application with the US Patent and Trademark Office  
564 related to this work. **Data and materials availability:** All data is available in the main text or the  
565 supplementary materials.  
566

567 **Reference**

- 568 1 Ruder, W. C., Lu, T. & Collins, J. J. Synthetic biology moving into the clinic. *Science*  
569 **333**, 1248-1252, doi:10.1126/science.1206843 (2011).
- 570 2 Lam, K. N., Alexander, M. & Turnbaugh, P. J. Precision Medicine Goes  
571 Microscopic: Engineering the Microbiome to Improve Drug Outcomes. *Cell Host*  
572 *Microbe* **26**, 22-34, doi:10.1016/j.chom.2019.06.011 (2019).
- 573 3 Riglar, D. T. *et al.* Engineered bacteria can function in the mammalian gut long-  
574 term as live diagnostics of inflammation. *Nat Biotechnol* **35**, 653-658,  
575 doi:10.1038/nbt.3879 (2017).
- 576 4 Mao, N., Cubillos-Ruiz, A., Cameron, D. E. & Collins, J. J. Probiotic strains detect  
577 and suppress cholera in mice. *Sci Transl Med* **10**,  
578 doi:10.1126/scitranslmed.aao2586 (2018).
- 579 5 Cagetti, M. G. *et al.* The use of probiotic strains in caries prevention: a systematic  
580 review. *Nutrients* **5**, 2530-2550, doi:10.3390/nu5072530 (2013).
- 581 6 Nakatsuji, T. *et al.* A commensal strain of *Staphylococcus epidermidis* protects  
582 against skin neoplasia. *Sci Adv* **4**, eaao4502, doi:10.1126/sciadv.aao4502 (2018).
- 583 7 Dickson, R. P., Erb-Downward, J. R. & Huffnagle, G. B. The role of the bacterial  
584 microbiome in lung disease. *Expert Rev Respir Med* **7**, 245-257,  
585 doi:10.1586/ers.13.24 (2013).
- 586 8 Forbes, N. S. Engineering the perfect (bacterial) cancer therapy. *Nature Reviews*  
587 *Cancer* **10**, 785-794 (2010).
- 588 9 Zhou, S., Gravekamp, C., Bermudes, D. & Liu, K. Tumour-targeting bacteria  
589 engineered to fight cancer. *Nat Rev Cancer* **18**, 727-743, doi:10.1038/s41568-018-  
590 0070-z (2018).
- 591 10 Flickinger, J. C., Jr., Rodeck, U. & Snook, A. E. *Listeria monocytogenes* as a  
592 Vector for Cancer Immunotherapy: Current Understanding and Progress.  
593 *Vaccines (Basel)* **6**, doi:10.3390/vaccines6030048 (2018).
- 594 11 Toso, J. F. *et al.* Phase I study of the intravenous administration of attenuated  
595 *Salmonella typhimurium* to patients with metastatic melanoma. *J Clin Oncol* **20**,  
596 142-152, doi:10.1200/JCO.2002.20.1.142 (2002).
- 597 12 Sanders, M. E. *et al.* Safety assessment of probiotics for human use. *Gut Microbes*  
598 **1**, 164-185, doi:10.4161/gmic.1.3.12127 (2010).
- 599 13 Yelin, I. *et al.* Genomic and epidemiological evidence of bacterial transmission  
600 from probiotic capsule to blood in ICU patients. *Nat Med* **25**, 1728-1732,  
601 doi:10.1038/s41591-019-0626-9 (2019).
- 602 14 Low, K. B. *et al.* Lipid A mutant *Salmonella* with suppressed virulence and  
603 TNFalpha induction retain tumor-targeting in vivo. *Nat Biotechnol* **17**, 37-41,  
604 doi:10.1038/5205 (1999).
- 605 15 Wang, C. Z., Kazmierczak, R. A. & Eisenstark, A. Strains, Mechanism, and  
606 Perspective: *Salmonella*-Based Cancer Therapy. *Int J Microbiol* **2016**, 5678702,  
607 doi:10.1155/2016/5678702 (2016).
- 608 16 Mitchell, M. J. *et al.* Engineering precision nanoparticles for drug delivery. *Nat Rev*  
609 *Drug Discov* **20**, 101-124, doi:10.1038/s41573-020-0090-8 (2021).
- 610 17 Anselmo, A. C., McHugh, K. J., Webster, J., Langer, R. & Jaklenec, A. Layer-by-  
611 Layer Encapsulation of Probiotics for Delivery to the Microbiome. *Adv Mater* **28**,  
612 9486-9490, doi:10.1002/adma.201603270 (2016).

- 613 18 Li, Z. H. *et al.* Biofilm-Inspired Encapsulation of Probiotics for the Treatment of  
614 Complex Infections. *Advanced Materials* **30**, doi:ARTN 1803925  
615 10.1002/adma.201803925 (2018).
- 616 19 Chen, W. *et al.* Bacteria-Driven Hypoxia Targeting for Combined Biotherapy and  
617 Photothermal Therapy. *ACS Nano* **12**, 5995-6005, doi:10.1021/acsnano.8b02235  
618 (2018).
- 619 20 Cao, Z., Wang, X., Pang, Y., Cheng, S. & Liu, J. Biointerfacial self-assembly  
620 generates lipid membrane coated bacteria for enhanced oral delivery and  
621 treatment. *Nat Commun* **10**, 5783, doi:10.1038/s41467-019-13727-9 (2019).
- 622 21 Cao, Z., Cheng, S., Wang, X., Pang, Y. & Liu, J. Camouflaging bacteria by  
623 wrapping with cell membranes. *Nat Commun* **10**, 3452, doi:10.1038/s41467-019-  
624 11390-8 (2019).
- 625 22 Qiao, Y. *et al.* Engineered algae: A novel oxygen-generating system for effective  
626 treatment of hypoxic cancer. *Sci Adv* **6**, eaba5996, doi:10.1126/sciadv.aba5996  
627 (2020).
- 628 23 Hu, Q. L. *et al.* Engineering Nanoparticle-Coated Bacteria as Oral DNA Vaccines  
629 for Cancer Immunotherapy. *Nano Lett* **15**, 2732-2739,  
630 doi:10.1021/acs.nanolett.5b00570 (2015).
- 631 24 Cress, B. F. *et al.* Masquerading microbial pathogens: capsular polysaccharides  
632 mimic host-tissue molecules. *FEMS Microbiol Rev* **38**, 660-697, doi:10.1111/1574-  
633 6976.12056 (2014).
- 634 25 Sonnenborn, U. Escherichia coli strain Nissle 1917-from bench to bedside and  
635 back: history of a special Escherichia coli strain with probiotic properties. *FEMS*  
636 *Microbiol Lett* **363**, doi:10.1093/femsle/fnw212 (2016).
- 637 26 Burns, S. M. & Hull, S. I. Comparison of loss of serum resistance by defined  
638 lipopolysaccharide mutants and an acapsular mutant of uropathogenic Escherichia  
639 coli O75:K5. *Infect Immun* **66**, 4244-4253 (1998).
- 640 27 Hafez, M. *et al.* The K5 capsule of Escherichia coli strain Nissle 1917 is important  
641 in mediating interactions with intestinal epithelial cells and chemokine induction.  
642 *Infect Immun* **77**, 2995-3003, doi:10.1128/IAI.00040-09 (2009).
- 643 28 Hafez, M., Hayes, K., Goldrick, M., Grecis, R. K. & Roberts, I. S. The K5 capsule  
644 of Escherichia coli strain Nissle 1917 is important in stimulating expression of Toll-  
645 like receptor 5, CD14, MyD88, and TRIF together with the induction of interleukin-  
646 8 expression via the mitogen-activated protein kinase pathway in epithelial cells.  
647 *Infect Immun* **78**, 2153-2162, doi:10.1128/IAI.01406-09 (2010).
- 648 29 Nzakizwanayo, J. *et al.* Disruption of Escherichia coli Nissle 1917 K5 Capsule  
649 Biosynthesis, through Loss of Distinct kfi genes, Modulates Interaction with  
650 Intestinal Epithelial Cells and Impact on Cell Health. *Plos One* **10**, doi:ARTN  
651 e0120430  
652 10.1371/journal.pone.0120430 (2015).
- 653 30 Wang, Z., Dordick, J. S. & Linhardt, R. J. Escherichia coli K5 heparosan  
654 fermentation and improvement by genetic engineering. *Bioeng Bugs* **2**, 63-67,  
655 doi:10.4161/bbug.2.1.14201 (2011).
- 656 31 Whitfield, C. & Roberts, I. S. Structure, assembly and regulation of expression of  
657 capsules in Escherichia coli. *Mol Microbiol* **31**, 1307-1319, doi:10.1046/j.1365-  
658 2958.1999.01276.x (1999).

- 659 32 Na, D. *et al.* Metabolic engineering of *Escherichia coli* using synthetic small  
660 regulatory RNAs. *Nat Biotechnol* **31**, 170-174, doi:10.1038/nbt.2461 (2013).
- 661 33 Hafez, M. *et al.* The K5 Capsule of *Escherichia coli* Strain Nissle 1917 Is Important  
662 in Mediating Interactions with Intestinal Epithelial Cells and Chemokine Induction.  
663 *Infection and Immunity* **77**, 2995-3003, doi:10.1128/iai.00040-09 (2009).
- 664 34 Xie, Y., Wahab, L. & Gill, J. J. Development and Validation of a Microtiter Plate-  
665 Based Assay for Determination of Bacteriophage Host Range and Virulence.  
666 *Viruses* **10**, doi:10.3390/v10040189 (2018).
- 667 35 Maciel, A. T., Noritomi, D. T. & Park, M. Metabolic acidosis in sepsis. *Endocr Metab*  
668 *Immune Disord Drug Targets* **10**, 252-257, doi:10.2174/187153010791936900  
669 (2010).
- 670 36 Hanzelka, B. L., Stevens, A. M., Parsek, M. R., Crone, T. J. & Greenberg, E. P.  
671 Mutational analysis of the *Vibrio fischeri* LuxI polypeptide: critical regions of an  
672 autoinducer synthase. *J Bacteriol* **179**, 4882-4887, doi:10.1128/jb.179.15.4882-  
673 4887.1997 (1997).
- 674 37 Allyn, J. *et al.* Prognosis of patients presenting extreme acidosis (pH <7) on  
675 admission to intensive care unit. *J Crit Care* **31**, 243-248,  
676 doi:10.1016/j.jcrc.2015.09.025 (2016).
- 677 38 Acharya, A. P., Rafi, M., Woods, E. C., Gardner, A. B. & Murthy, N. Metabolic  
678 engineering of lactate dehydrogenase rescues mice from acidosis. *Sci Rep* **4**, 5189,  
679 doi:10.1038/srep05189 (2014).
- 680 39 Le Tourneau, C., Lee, J. J. & Siu, L. L. Dose escalation methods in phase I cancer  
681 clinical trials. *J Natl Cancer Inst* **101**, 708-720, doi:10.1093/jnci/djp079 (2009).
- 682 40 Aston, W. J. *et al.* A systematic investigation of the maximum tolerated dose of  
683 cytotoxic chemotherapy with and without supportive care in mice. *BMC Cancer* **17**,  
684 684, doi:10.1186/s12885-017-3677-7 (2017).
- 685 41 Nemzek, J. A., Hugunin, K. M. & Opp, M. R. Modeling sepsis in the laboratory:  
686 merging sound science with animal well-being. *Comp Med* **58**, 120-128 (2008).
- 687 42 Harimoto, T. *et al.* Rapid screening of engineered microbial therapies in a 3D  
688 multicellular model. *Proc Natl Acad Sci U S A* **116**, 9002-9007,  
689 doi:10.1073/pnas.1820824116 (2019).
- 690 43 Fedorec, A. J. H. *et al.* Two New Plasmid Post-segregational Killing Mechanisms  
691 for the Implementation of Synthetic Gene Networks in *Escherichia coli*. *IScience*  
692 **14**, 323-+, doi:10.1016/j.isci.2019.03.019 (2019).
- 693 44 Roberts, N. J. *et al.* Intratumoral injection of *Clostridium novyi*-NT spores induces  
694 antitumor responses. *Sci Transl Med* **6**, 249ra111,  
695 doi:10.1126/scitranslmed.3008982 (2014).
- 696 45 Nemunaitis, J. *et al.* Pilot trial of genetically modified, attenuated *Salmonella*  
697 expressing the *E. coli* cytosine deaminase gene in refractory cancer patients.  
698 *Cancer Gene Ther* **10**, 737-744, doi:10.1038/sj.cgt.7700634 (2003).
- 699 46 Charbonneau, M. R., Isabella, V. M., Li, N. & Kurtz, C. B. Developing a new class  
700 of engineered live bacterial therapeutics to treat human diseases. *Nat Commun*  
701 **11**, 1738, doi:10.1038/s41467-020-15508-1 (2020).
- 702 47 Silverstein, M. J., DeKernion, J. & Morton, D. L. Malignant melanoma metastatic  
703 to the bladder. Regression following intratumor injection of BCG vaccine. *JAMA*  
704 **229**, 688 (1974).

- 705 48 Kocijancic, D. *et al.* Local application of bacteria improves safety of Salmonella -  
706 mediated tumor therapy and retains advantages of systemic infection. *Oncotarget*  
707 **8**, 49988-50001, doi:10.18632/oncotarget.18392 (2017).
- 708 49 Kienle, G. S. Fever in Cancer Treatment: Coley's Therapy and Epidemiologic  
709 Observations. *Glob Adv Health Med* **1**, 92-100, doi:10.7453/gahmj.2012.1.1.016  
710 (2012).
- 711 50 Copeland, S. *et al.* Acute inflammatory response to endotoxin in mice and humans.  
712 *Clin Diagn Lab Immunol* **12**, 60-67, doi:10.1128/CDLI.12.1.60-67.2005 (2005).
- 713 51 Augustin, L. B. *et al.* Salmonella enterica Typhimurium engineered for nontoxic  
714 systemic colonization of autochthonous tumors. *J Drug Target* **29**, 294-299,  
715 doi:10.1080/1061186X.2020.1818759 (2021).
- 716 52 van Pijkeren, J. P. *et al.* A novel *Listeria monocytogenes*-based DNA delivery  
717 system for cancer gene therapy. *Hum Gene Ther* **21**, 405-416,  
718 doi:10.1089/hum.2009.022 (2010).
- 719 53 Zheng, D. W. *et al.* Optically-controlled bacterial metabolite for cancer therapy. *Nat*  
720 *Commun* **9**, 1680, doi:10.1038/s41467-018-03233-9 (2018).
- 721 54 Lemire, S., Yehl, K. M. & Lu, T. K. Phage-Based Applications in Synthetic Biology.  
722 *Annu Rev Virol* **5**, 453-476, doi:10.1146/annurev-virology-092917-043544 (2018).
- 723 55 Tahoun, A. *et al.* Capsular polysaccharide inhibits adhesion of *Bifidobacterium*  
724 *longum* 105-A to enterocyte-like Caco-2 cells and phagocytosis by macrophages.  
725 *Gut Pathog* **9**, 27, doi:10.1186/s13099-017-0177-x (2017).
- 726 56 Duong, M. T., Qin, Y., You, S. H. & Min, J. J. Bacteria-cancer interactions: bacteria-  
727 based cancer therapy. *Exp Mol Med* **51**, 1-15, doi:10.1038/s12276-019-0297-0  
728 (2019).
- 729 57 Lebeer, S., Vanderleyden, J. & De Keersmaecker, S. C. Host interactions of  
730 probiotic bacterial surface molecules: comparison with commensals and  
731 pathogens. *Nat Rev Microbiol* **8**, 171-184, doi:10.1038/nrmicro2297 (2010).
- 732 58 Sorg, R. A., Gallay, C., Van Maele, L., Sirard, J. C. & Veening, J. W. Synthetic  
733 gene-regulatory networks in the opportunistic human pathogen *Streptococcus*  
734 *pneumoniae*. *Proc Natl Acad Sci U S A* **117**, 27608-27619,  
735 doi:10.1073/pnas.1920015117 (2020).
- 736 59 Siggins, M. K. *et al.* Extracellular bacterial lymphatic metastasis drives  
737 *Streptococcus pyogenes* systemic infection. *Nat Commun* **11**, 4697,  
738 doi:10.1038/s41467-020-18454-0 (2020).
- 739

## 1 **Materials and Methods**

### 3 ***Bacterial strains and culturing***

4 The host strain used in this study was *Escherichia coli* Nissle 1917 (EcN) that naturally expresses  
5 K5 capsular polysaccharide (CAP) containing a genomically integrated erythromycin-resistance  
6 *luxCDABE* cassette for bacterial bioluminescence tracking *in vivo*. For all strains used in this study,  
7 please refer to Table S1. All bacteria were grown with appropriate antibiotics selection (100 µg/mL  
8 ampicillin, 50 µg/mL kanamycin, 25 µg/mL chloramphenicol, 50 µg/mL erythromycin) in LB media  
9 (Sigma-Aldrich) at 225 RPM or on LB-agar plates containing 1.5% agar at 37°C.

### 11 ***Construction of plasmids and gene circuits***

12 To construct a knockdown library, plasmids with sRNA targeting each gene of the CAP  
13 biosynthetic pathway were prepared using Gibson Assembly. The sRNA sequences were  
14 designed to be complementary and bind to the 24-nucleotide sequence of the target gene coding  
15 sequence spanning the ribosome binding site and the start codon<sup>1,2</sup>. A plasmid template was  
16 prepared by PCR-amplifying backbone (pTH05) using primers (pTH05\_for and pTH05\_rev), and  
17 the single-stranded DNA for sRNA against genes in CAP biosynthesis were inserted (*kfiA*, *kfiB*,  
18 *kfiD*, *kpsC*, *kpsS*, *kpsF*, *kpsU*, *kpsE*, *kpsD*, *kpsT*, *kpsM*), and transformed into Mach1 competent  
19 cells (Invitrogen). CAP gene circuits and the therapeutic plasmids were constructed in a similar  
20 manner. Genes of interest were obtained by synthesizing oligos or gBlock from IDT, or PCR-  
21 amplification (*kfiC* gene was obtained via colony PCR from EcN). Subsequently, plasmids were  
22 constructed using Gibson Assembly or using standard restriction digest and ligation cloning, and  
23 transformed into Mach1 competent cells (Invitrogen).

### 25 ***Construction of knockout strains***

26 EcN was transformed to carry Lambda Red helper plasmid (pKD46)<sup>3</sup>. Transformants were grown  
27 in 50 mL LB at 30°C with chloramphenicol to an OD600 of 0.4 and made electrocompetent by  
28 washing three times with ice cold MilliQ water and concentrating 150-fold in 15% glycerol.  
29 Chloramphenicol-resistance cassette was prepared by PCR with primers flanked by sequence  
30 within each target gene followed by gel purification and resuspension in MilliQ water.  
31 Electroporation was performed using 50 µL of competent cells and 10-100 ng of DNA. Shocked  
32 cells were added to 1mL SOC, incubated at 30°C for 1 hour with 20 µL arabinose, and incubated  
33 at 37°C for 1 hour. Cells were then plated on LB plates with chloramphenicol and incubated in  
34 37°C overnight. Colonies were picked the next day to obtain knockout strains including  $\Delta kfiC$   
35 strain (EcN  $\Delta kfiC$ ).

### 37 ***Characterization of CAP strains sensitivity to phages, antibiotics, and acids***

38 To perform plaque forming assay, bacteria were plated onto LB agar plates to make a lawn and  
39 allowed to dry under fire. 10 µL of serial diluted  $\Phi$ K1-5 phage (Molineux, University of Texas,  
40 Austin) was spotted onto the plates and allowed to dry. Plates were incubated at 37°C overnight  
41 and inspected the next day for plaque forming unit (PFU) counting. Similar phage plaque forming  
42 assay were performed for K1 and K5 type *E. coli* strains.

44 To assess bacterial growth in liquid culture, overnight cultures of EcN, EcN  $\Delta kfiC$ , or EcN iCAP  
45 strains were calibrated into OD600 of 1.0, and 100 µL of each was transferred into 96-well plate  
46 (Corning). 1 µL of 10<sup>8</sup> PFU  $\Phi$ K1-5 phage, or antibiotics of indicated concentrations were added to  
47 each well. The samples were incubated at 37°C with shaking in Tecan plate reader, and the  
48 OD600 was measured every 20 min. For bacterial growth in low pH condition, LB media adjusted  
49 to pH2.5 using HCl, bacteria were incubated at 37°C for 1 hour, followed by serial dilution and  
50 plating on a LB agar plate for CFU enumeration.

51

## 52 **Characterization of CAP using SDS-PAGE**

53 CAP was purified via the chloroform-phenol extraction as previously described<sup>4,5</sup>. Briefly, 3 mL of  
54 overnight bacteria cultures were harvested the next day and further sub-cultured in 50 mL LB  
55 broth in the presence or absence of 0.1 M IPTG for indicated lengths of time. Bacteria  
56 concentrations were adjusted to the same level across samples via OD600 before centrifugation.  
57 Pellets were collected and resuspended in 150  $\mu$ L of water. An equal amount of hot phenol (65°C)  
58 was added, and the mixtures were vortexed vigorously. The mixtures were then incubated at 65°C  
59 for 20 minutes, followed by chloroform extraction (400  $\mu$ L) and centrifugation. The CAP were  
60 detected by alcian blue staining as previously reported<sup>5-7</sup>. Briefly, following SDS-PAGE  
61 electrophoresis (4-20% gradient), the gel was fixed in fixing solution (25% ethanol, 10% acetic  
62 acid in water) for 15 minutes while shaking at room temperature. The gel was then incubated in  
63 alcian blue solution (0.125% alcian blue in 25% ethanol, 10% acetic acid in water) at room  
64 temperature for 2 hours while shaking before de-stained overnight in fixing solution. CAP was  
65 visualized as alcian blue stained bands on the resulting gel.

## 66 **Visualization of CAP using TEM**

67 Bacteria were grown overnight in LB media with appropriate antibiotics before being processed  
68 for imaging. For EcN iCAP, a 1:100 dilution in LB with antibiotics was made the following day and  
69 grown in 37°C shaker until OD600 = 0.1–0.4 (mid-log phase), and varying concentrations of IPTG  
70 were added for further incubation for 6 hours before being processed. The cultures were spun  
71 down at 300 relative centrifugal force (rcf) for 10 min and embedded in 2% agarose. Each agarose  
72 gel fragment was cut into a cube with 2-mm edge and placed in a 1.5-mL centrifuge tube. The  
73 samples embedded in agarose were fixed and stained via protocols previously reported<sup>8</sup>. Briefly,  
74 the samples were fixed with 2% paraformaldehyde and 2.5% glutaraldehyde in osmotically  
75 adjusted buffer (0.1 M sodium cacodylate, 0.9 M sucrose, 10 mM CaCl<sub>2</sub>, 10 mM MgCl<sub>2</sub>) with 0.075%  
76 ruthenium red and 75 mM lysine acetate for 20 min on ice. The samples were washed with  
77 osmotically adjusted buffer containing 0.075% ruthenium red twice and further fixed with 1%  
78 osmium tetroxide in osmotically adjusted buffer containing 0.075% ruthenium red for an hour on  
79 ice. The samples were washed three times in water with 5 min incubation between each wash  
80 and dehydrated in increasing concentrations of ethanol (50%, 70%, and 100%) on ice for 15 min  
81 per step. The samples were washed one more time in 100% ethanol and embedded in increasing  
82 concentrations of Spurr's resin (33% and 66%) diluted in ethanol for 30 min per step and overnight  
83 in 100% Spurr's resin. The samples were moved to fresh Spurr's resin the next day and  
84 polymerized at 65°C overnight before sectioned using SORVALL MT-2B Ultramicrotome to ~70  
85 nm. The sample sections were placed on TEM grids (Ted Pella; 01800F) and stained using  
86 UranylLess (EMS). The sample grids were imaged using FEI Talos 200 TEM.

## 87 **TEM image processing and data analysis of polysaccharide layer**

88 The image processing of TEM images was performed using ImageJ, and the data analysis was  
89 done using MATLAB. Due to low signal-to-noise ratio of the TEM images resulting from thinly  
90 sectioned bacteria samples stained using ruthenium red, Gaussian blur was used to reduce the  
91 noise and help determine boundary of polysaccharide layer. Polysaccharide layer was selected  
92 and transformed into binary image using threshold function. Some portion of boundary of  
93 polysaccharide layer was manually outlined when the thresholding function could not determine  
94 where the boundary is. The resulting binary image of polysaccharide layer was used to identify  
95 the centroid and measure distribution of polysaccharide thickness in respect to the centroid. For  
96 each sample, five representative images were used to measure the polysaccharide thickness and  
97 the measurements were aggregated to form histograms. The resulting histograms were fitted with  
98 Gaussian curves to extract mean and standard deviation of polysaccharide layer thickness.

## 99 **In vitro whole blood bactericidal assays**



103 EcN, EcN  $\Delta kfiC$ , or EcN iCAP bacterial cultures were grown overnight in LB broth with appropriate  
104 antibiotics and IPTG concentrations. The cultures were spun down at 3000 rcf for 5 min and  
105 resuspended in 1 mL sterile PBS. They were further normalized to an OD600 of 1 with sterile  
106 PBS. 150  $\mu$ L of blood from the single donor human whole blood or murine (BALB/c) whole blood  
107 (Innovative Research) were aliquoted into 3 wells/strain in a 96-well plate. 1.5  $\mu$ L of bacteria were  
108 added to each well and incubated at 37°C. At various time points, the plate was taken out, and a  
109 serial dilution of each sample was prepared in PBS. The dilutions were plated on LB agar plates  
110 with erythromycin. The agar plates were incubated at 37°C overnight and inspected the next day  
111 for CFU counting.

### 112 113 **Phagocytosis assays**

114 The phagocytosis assays were performed via protocols as previously reported<sup>9,10</sup>. Briefly, bone  
115 marrow derived macrophages (BMDM) were thawed on a 15 cm non-TC treated petri dish and  
116 cultured in RPMI with 10% FBS and MCSF for 4 days before experiment. On the 4<sup>th</sup> day, BMDMs  
117 were collected, counted and diluted to  $2 \times 10^5$  cells/mL in RPMI with 10% FBS (without antibiotics).  
118 Afterwards, 1 mL of the new mixture was plated per well ( $2 \times 10^5$  cells) in a 24-well TC-treated  
119 plate and cultured overnight. Media in the 24-well BMDM plate was removed the next day, and 1  
120 mL of EcN iCAP constitutively expressing GFP with or without IPTG induction were resuspended  
121 in RPMI with 10% FBS without antibiotics was added into each well at MOI of 100. The co-culture  
122 was incubated for 30 min at 37°C followed by rigorous washing with PBS at least 3 times. 1 mL  
123 of RPMI with 10% FBS and gentamicin (30  $\mu$ g/mL) was added to each well, followed by live  
124 imaging under confocal microscopy. 0.1 M IPTG was added to EcN iCAP with IPTG induction the  
125 entire time. Then, the BMDMs were lysed with 0.5% TritonX in PBS and lysates were collected  
126 and plated on LB agar with erythromycin followed by overnight incubation at 37°C. Colonies were  
127 counted the next day. ImageJ was used to count the number of macrophages, engulfed bacterial  
128 cells, and macrophages containing engulfed bacterial cells from the confocal images. The  
129 phagocytic index was calculated according to the following formula: phagocytic index = (total  
130 number of engulfed bacterial cells/total number of counted macrophages)  $\times$  (number of  
131 macrophages containing engulfed bacterial cells/total number of counted macrophages)  $\times$  100.  
132

### 133 **Determination of TNF-alpha response**

134 THP-1 cells (ATCC) were maintained in RPMI-1640 supplemented with 10% FBS, 2 mM L-  
135 glutamine, 100  $\mu$ g/mL streptomycin, 100  $\mu$ g/mL penicillin, and 0.1% mercaptoethanol at 37°C and  
136 5% CO<sub>2</sub>. Cells were passaged every 72 hours. For cell quantification and viability analysis, cells  
137 were stained using trypan blue stain. For *in vitro* TNF-alpha assay, THP-1 was resuspended at a  
138 concentration of  $1 \times 10^6$  cells/mL in RPMI-1640 supplemented with 10% FBS and 0.1%  
139 gentamycin. 300  $\mu$ L of cell suspension was transferred into each well of a 24-well plate. 3  $\mu$ L of  
140 each bacterial strain at each concentration were added to cell culture wells. Subsequently, the  
141 culture medium was harvested and centrifuged at 200 rcf for 5 min to isolate THP-1 without  
142 causing cell death. Supernatant was then centrifuged at 3000 rcf for 5 min to remove bacteria.  
143 The resulting supernatant was analyzed for TNF-alpha response. TNF-alpha was measured using  
144 an R&D Systems Quantikine ELISA Kit in a plate reader.  
145

### 146 **Animal models**

147 All animal experiments were approved by the Institutional Animal Care and Use Committee  
148 (Columbia University, protocols ACAAAN8002 and AC-AAAZ4470). For tumor-bearing animals,  
149 euthanasia was required when the tumor burden reaches 2 cm in diameter or after  
150 recommendation by the veterinary staff. Mice were blindly randomized into various groups. Animal  
151 experiments were performed on 8–12 weeks-old female BALB/c mice (Taconic Biosciences).  
152 Tumor models were established with bilateral subcutaneous hind flank injection of mouse  
153 colorectal carcinoma CT26 cells (ATCC) or mammary fat pad injection of 4T1-luciferase

154 mammary carcinoma cells (Kang, Princeton University). The concentration for implantation of the  
155 tumor cells was  $5 \times 10^7$  cells per ml in RPMI (no phenol red). Cells were injected at a volume of  
156 100  $\mu$ l per flank, with each implant consisting of  $5 \times 10^6$  cells. Female transgenic MMTV-PyMT  
157 mice (Jackson Laboratory) which develops mammary tumors were also used. Tumors were grown  
158 to an average of approximately 200–400 mm<sup>3</sup> before experiments. Tumor volume was quantified  
159 using calipers to measure the length, width, and height of each tumor ( $V = L \times W \times H$ ). Because  
160 z dimension of PyMT tumor is highly variable, total volume was calculated as length  $\times$  width<sup>2</sup>  $\times$   
161 0.5. Volumes were normalized to pre-injection values to calculate relative or % tumor growth on  
162 a per mouse basis.

163

#### 164 **Bacterial administration for in vivo experiments**

165 Overnight cultures of EcN, EcN  $\Delta kfiC$ , and EcN iCAP were grown in LB medium with the  
166 appropriate antibiotics and inducers. A 1:100 dilution in LB with appropriate antibiotics and  
167 inducers was made the following day and grown in 37°C shaker until OD600 = 0.1–0.4 (mid-log  
168 phase). Cultures were centrifuged at 3000 rcf for 10 min and washed three times with cold sterile  
169 PBS. The bacteria were then normalized to a desired OD600. Unless otherwise noted,  
170 intravenous injections were given through the tail-vein at the dose of  $5 \times 10^6$  cells/mL (OD600 of  
171 0.5) in PBS with a total volume of 100  $\mu$ L per mouse. Intratumoral injections of bacteria were  
172 performed at a concentration of  $5 \times 10^6$  cells/mL with a total volume of 40  $\mu$ L per tumor.  
173 Intraperitoneal injections were injected at varying concentrations in PBS with a total volume of  
174 100  $\mu$ L per mouse. For induction of theta toxin production, AHL subcutaneous injection was given  
175 to mice daily at 10  $\mu$ M concentration with a total volume of 500  $\mu$ L per mouse. For *in situ* activation  
176 of iCAP, water containing 10 mM IPTG was given to mice a day after bacterial administration.

177

#### 178 **Biodistribution and in vivo animal imaging**

179 All bacterial strains used in this study had integrated *luxCDABE* cassette that could be visualized  
180 by IVIS spectrum imaging system (Perkin Elmer) and were quantified by Living Image software.  
181 Images and body weight of mouse were obtained every day starting the day of bacterial  
182 administration until the study endpoint. At the study endpoint, mice were euthanized by carbon  
183 dioxide, and the tumors and organs (spleen, liver, and lungs) were extracted and imaged. They  
184 were later weighed and homogenized using a gentleMACS tissue dissociator (C Tubes, Miltenyi  
185 Biotec). Homogenates were serially diluted with sterile PBS and plated on LB agar plates with  
186 erythromycin and incubated overnight at 37°C. Colonies were counted the next day.

187

#### 188 **Statistical analysis**

189 Statistical tests were performed either in GraphPad Prism 7.0 (Student's t-test and ANOVA) or  
190 Microsoft Excel. The details of the statistical tests are indicated in the respective figure legends.  
191 When data were approximately normally distributed, values were compared using either a  
192 Student's t-test, one-way ANOVA for single variable, or a two-way ANOVA for two variables. Mice  
193 were randomized into different groups before experiments.

194

195

196 **References**

- 197 1. Na, D.; Yoo, S. M.; Chung, H.; Park, H.; Park, J. H.; Lee, S. Y. Metabolic Engineering of  
198 Escherichia Coli Using Synthetic Small Regulatory RNAs. *Nature Biotechnology* **2013**, *31*,  
199 170–174.
- 200 2. Yoo, S. M.; Na, D.; Lee, S. Y. Design and Use of Synthetic Regulatory Small RNAs to  
201 Control Gene Expression in Escherichia Coli. *Nature Protocols* **2013**, *8*, 1694–1707.
- 202 3. Datsenko, K. A.; Wanner, B. L. One-Step Inactivation of Chromosomal Genes in  
203 Escherichia Coli K-12 Using PCR Products. *Proceedings of the National Academy of*  
204 *Sciences* **2000**, *97*, 6640–6645.
- 205 4. Hsieh, P. F.; Lin, T. L.; Yang, F. L.; Wu, M. C.; Pan, Y. J.; Wu, S. H.; Wang, J. T.  
206 Lipopolysaccharide O1 Antigen Contributes to the Virulence in Klebsiella Pneumoniae  
207 Causing Pyogenic Liver Abscess. *PLoS ONE* **2012**, *7*.
- 208 5. Hsieh, P. F.; Lin, H. H.; Lin, T. L.; Chen, Y. Y.; Wang, J. T. Two T7-like Bacteriophages,  
209 K5-2 and K5-4, Each Encodes Two Capsule Depolymerases: Isolation and Functional  
210 Characterization. *Scientific Reports* **2017**, *7*.
- 211 6. Moller, H. J.; Heinegard, D.; Poulsen, J. H. Combined Alcian Blue and Silver Staining of  
212 Subnanogram Quantities of Proteoglycans and Glycosaminoglycans in Sodium Dodecyl  
213 Sulfate-Polyacrylamide Gels. *Analytical Biochemistry* **1993**, *209*, 169–175.
- 214 7. Zamze, S.; Martinez-Pomares, L.; Jones, H.; Taylor, P. R.; Stillion, R. J.; Gordon, S.; Wong,  
215 S. Y. C. Recognition of Bacterial Capsular Polysaccharides and Lipopolysaccharides by  
216 the Macrophage Mannose Receptor. *Journal of Biological Chemistry* **2002**, *277*, 41613–  
217 41623.
- 218 8. Hammerschmidt, S.; Wolff, S.; Hocke, A.; Rosseau, S.; Müller, E.; Rohde, M. Illustration of  
219 Pneumococcal Polysaccharide Capsule during Adherence and Invasion of Epithelial Cells.  
220 *Infection and Immunity* **2005**, *73*, 4653–4667.
- 221 9. Sokolovska, A.; Becker, C. E.; Stuart, L. M. Measurement of Phagocytosis, Phagosome  
222 Acidification, and Intracellular Killing of *Staphylococcus Aureus*. *Current Protocols in*  
223 *Immunology* **2012**, *99*, 14.30.1-14.30.12.
- 224 10. Drevets, D. A.; Canono, B. P.; Campbell, P. A. Measurement of Bacterial Ingestion and  
225 Killing by Macrophages. *Current Protocols in Immunology* **2015**, *109*, 14.6.1-14.6.17.  
226
