# Supplementary material for: A programmable probiotic encapsulation system enhances therapeutic delivery in vivo
Source: bioRxiv or medRxiv preprint supplement (doi:10.1101/2021.08.03.454638), 2021-08-03
Supplement: Supplementary file [file media-1.pdf]

1 **Supplementary Figures and Tables**  
2

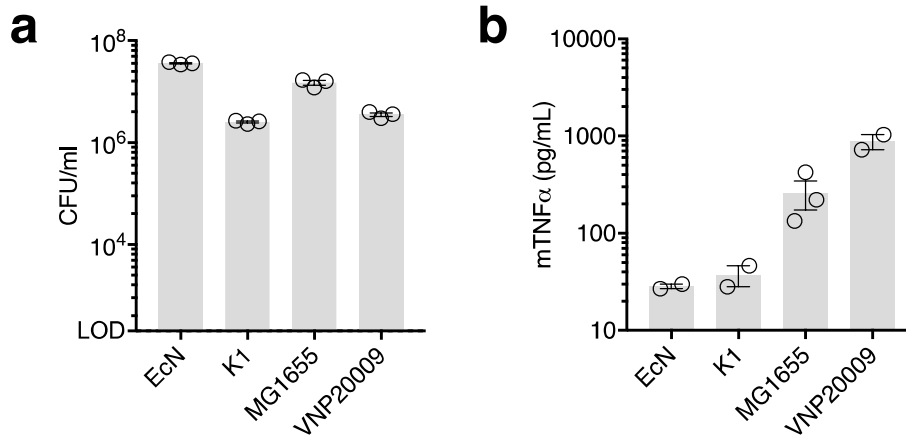

3  
4  
5 **Supplementary Figure 1: Survival and immunogenicity of *E. coli* and *S. typhimurium***  
6 **strains. a,** Bacterial survival in human whole blood. 10<sup>8</sup> CFU/mL bacteria was incubated  
7 in the blood for 2 hours and plated on LB agar for CFU enumeration. **b,** Immune  
8 recognition of the bacteria. TNFα production by THP-1 cells co-cultured with bacteria for  
9 0.5 hour, measured by ELISA. All error bars represent standard error of mean (SEM).  
10  
11

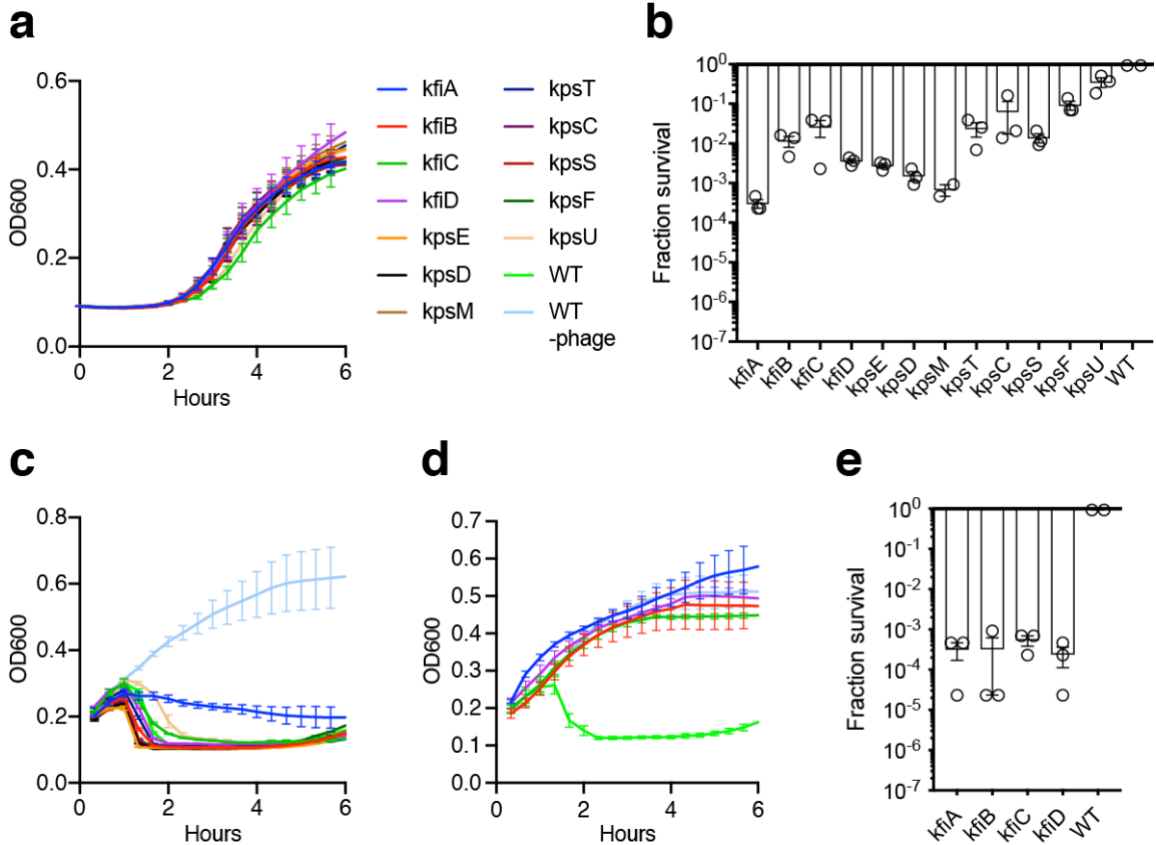

12  
13  
14  
15  
16  
17  
18  
19  
20  
21  
22  
23  
24  
25

**Supplementary Figure 2: Characterization of sRNA knockdown (KD) and knockout (KO) strains.** **a**, Growth kinetics of KD strains of *E. coli* Nissle 1917 (EcN) in LB media. OD<sub>600</sub> was measured over time in a plate reader. **b**, KD strain survival in human blood. Bacteria were inoculated in human whole blood for 0.5 hour, and plated on LB agar for CFU enumeration. Survival fraction is fraction of CFU of KD strain over CFU of wild-type (WT) strain. **c**, Growth of KD strains in LB media containing ΦK1-5. WT strain without ΦK1-5 was included as a baseline bacterial growth. **d**, Growth of KO strains in LB media containing ΦK1-5. WT strain without ΦK1-5 was included as a baseline bacterial growth. (n = 3 per group. All error bars represent SEM.) **e**, KO strain survival in human blood. Bacteria were inoculated in human whole blood for 0.5 hour and plated on LB agar for CFU enumeration. Survival fraction is fraction CFU of KD strain over CFU of WT strain.

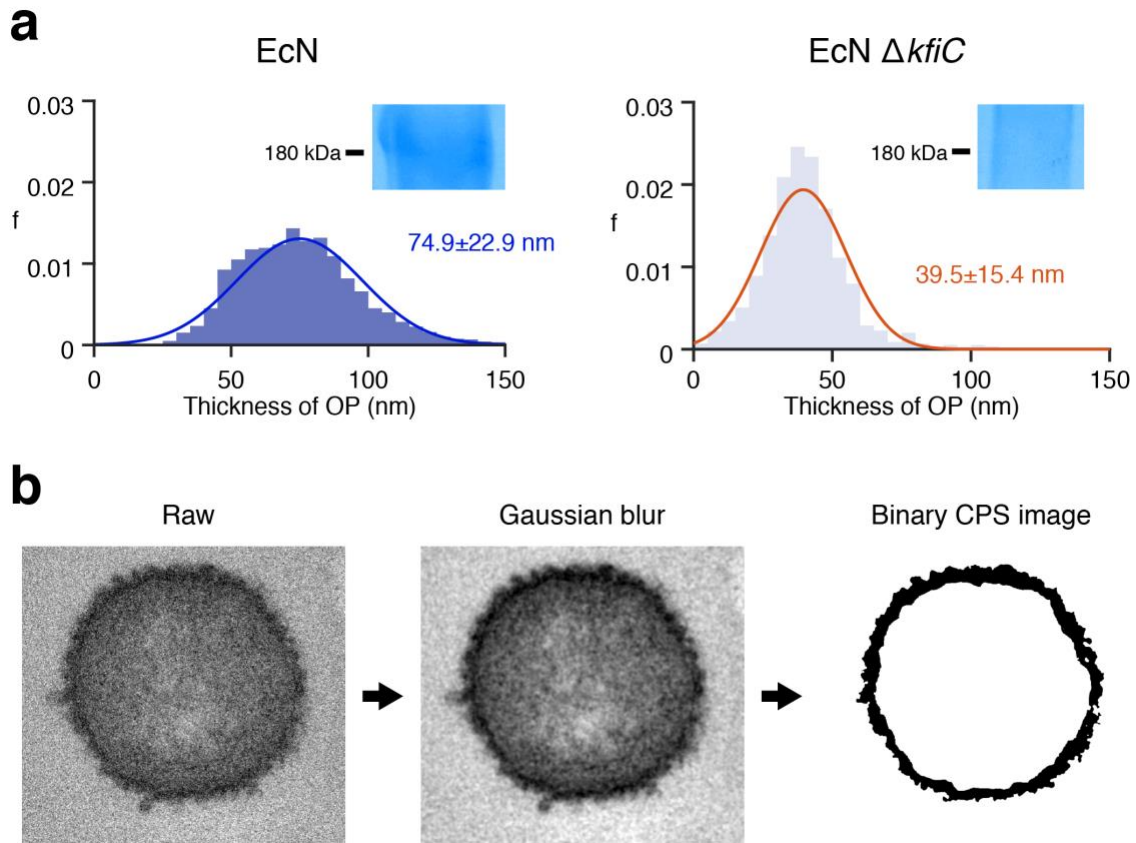

26  
27  
28  
29  
30  
31  
32  
33  
34  
35  
36

**Supplementary Figure 3: Capsular polysaccharide thickness quantification. a,** Histograms of the thickness of polysaccharide layer of EcN WT and EcN  $\Delta kfiC$  strain. The Gaussian curve were fitted to obtain mean and standard deviation of the polysaccharide layer of each strain. Inset shows SDS-PAGE gel. Alcian blue stain confirmed presence of ~180 kDa band for EcN strain. **b,** TEM image processing of polysaccharide layer. Raw images were first processed using Gaussian blur to reduce noise and further transformed into binary images for image analysis to measure the thickness of ruthenium red-stained polysaccharide layer.

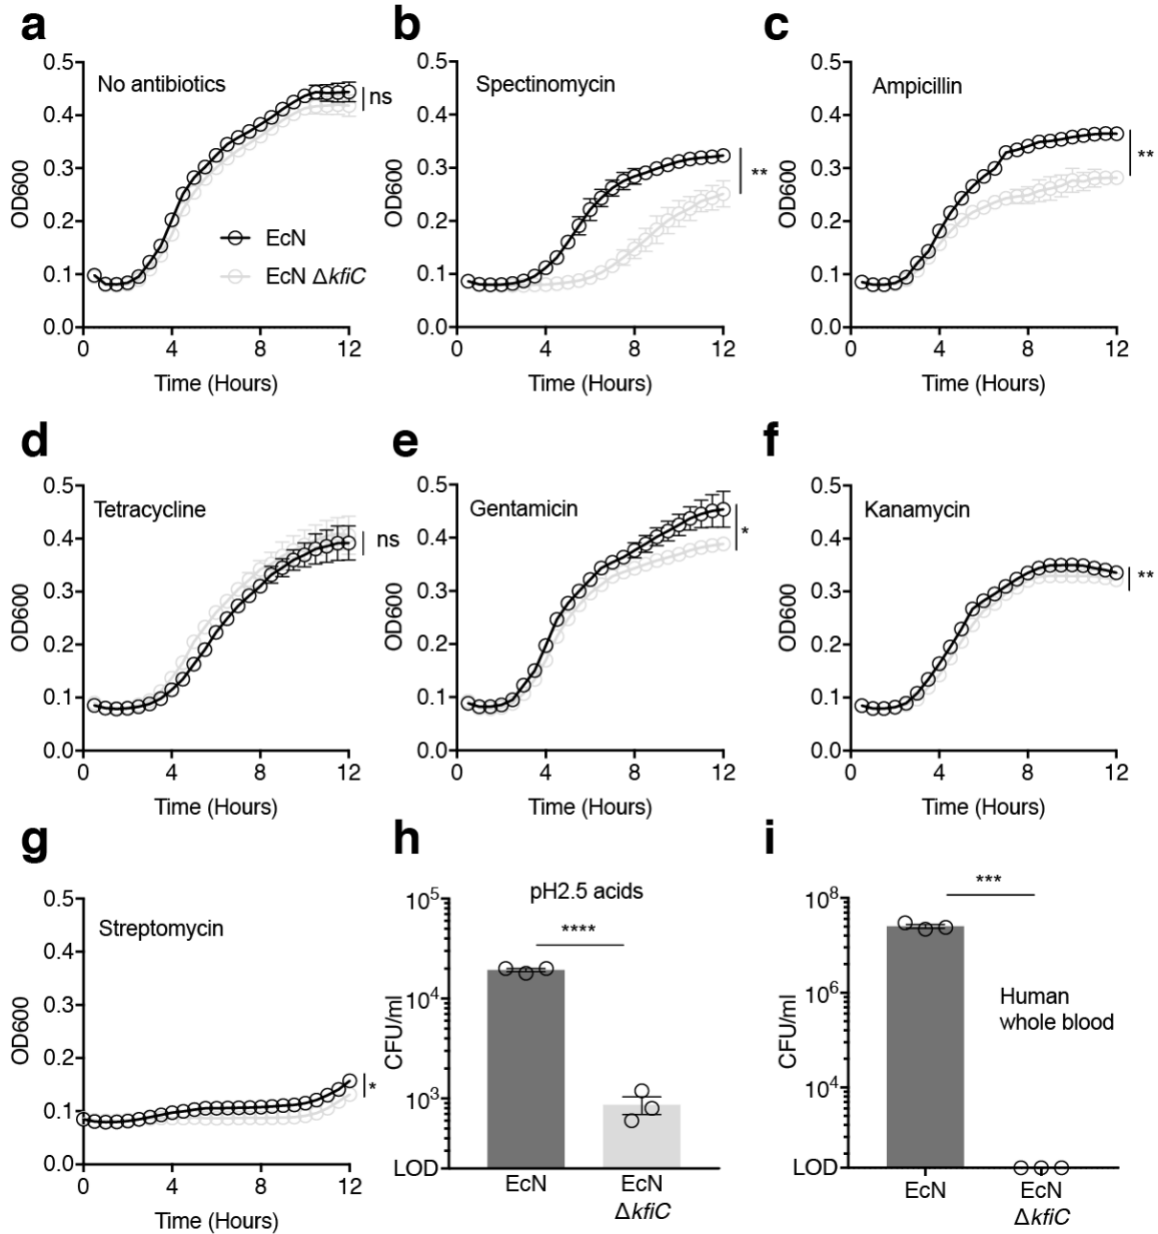

37  
38  
39  
40  
41  
42  
43  
44  
45  
46  
47  
48  
49  
50

**Supplementary Figure 4: Bacterial protection against environmental threats. a–g,** Growth kinetics of EcN and EcN  $\Delta kfiC$  in LB media containing sublethal concentration of antibiotics. (a) No antibiotics, (b) 10  $\mu\text{g}/\text{mL}$  Spectinomycin, (c) 2  $\mu\text{g}/\text{mL}$  Ampicillin, (d) 0.2  $\mu\text{g}/\text{mL}$  Tetracycline, (e) 1  $\mu\text{g}/\text{mL}$  Gentamicin, (f) 10  $\mu\text{g}/\text{mL}$  Kanamycin, (g) 5  $\mu\text{g}/\text{mL}$  Streptomycin (n.s. = 0.0585, \*\*P = 0.0043, \*\*P = 0.0042, n.s. = 0.255, \*P = 0.041, \*\*P = 0.0089, \*P = 0.016 respectively. n = 3. two-way ANOVA). **h,** Bacterial survival in low pH condition. Bacteria were incubated in LB media at pH = 2.5 for 1 hour and plated on LB agar for CFU enumeration. **i,** Bacterial survival in human blood. Bacteria were inoculated in human whole blood for 0.5 hours and plated on LB agar for CFU enumeration. All error bars represent SEM.

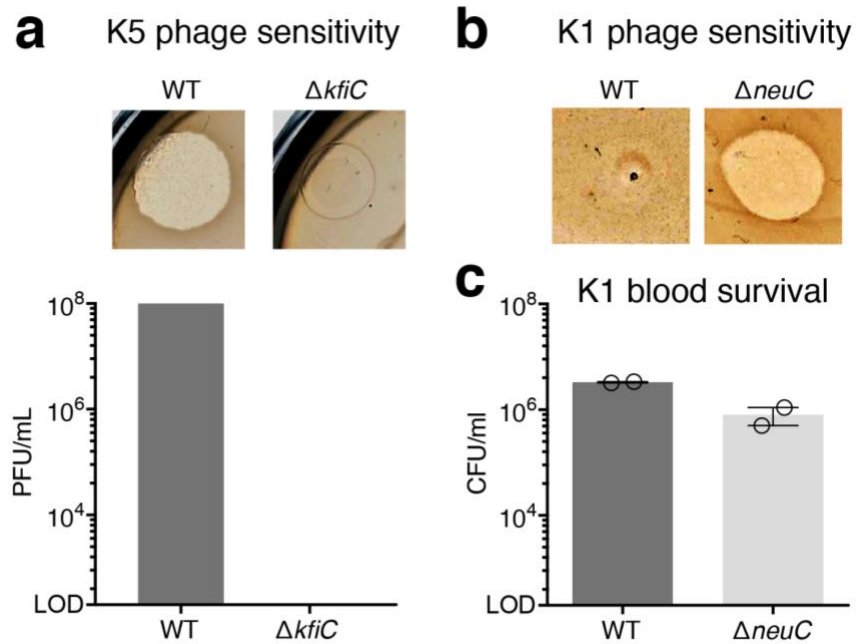

51  
52  
53  
54  
55  
56  
57  
58

**Supplementary Figure 5: Characterization of CAP deletion in K1 and K5 strains. a,b,** Phage sensitivity of WT and KO mutant of *E. coli* (a) K5 and (b) K1 strains. K1 CAP protects against T7 phage, and K5 CAP is targeted by  $\Phi$ K1-5 phage. Quantification of K5 plaque assay is shown at the bottom bar plot. **c,** K1 bacterial survival in serum. WT and  $\Delta neuC$  K1 strains were inoculated in mouse serum for 1.5 hour and plated on LB agar for CFU enumeration. All error bars represent SEM.

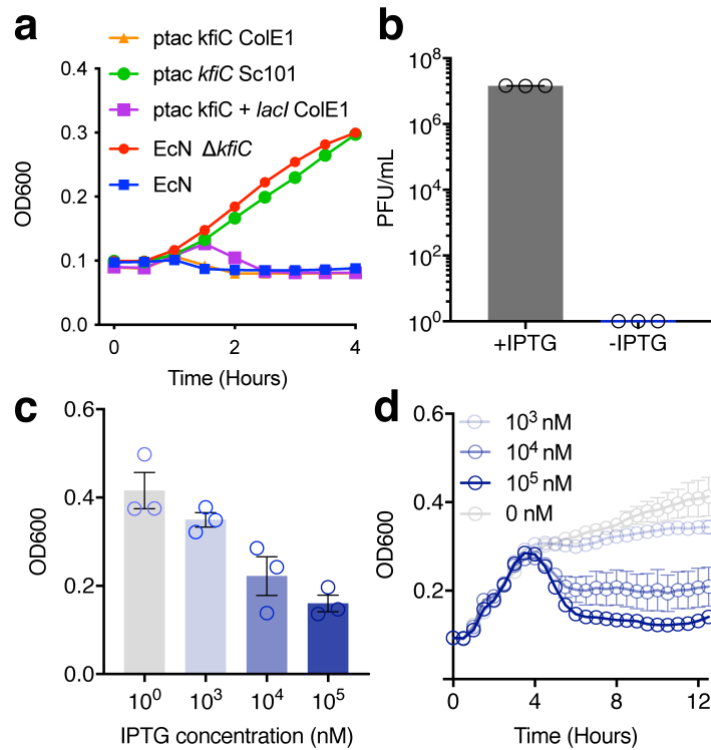

59  
60  
61  
62  
63  
64  
65  
66  
67  
68  
69  
70  
71  
72  
73  
74

**Supplementary Figure 6: Phage sensitivity of the programmable capsular polysaccharide (iCAP) system.** **a**, Growth curve of EcN expressing *kfiC* gene under various copy number plasmids. Bacteria were grown in LB media containing  $\Phi$ K1-5. **b**, Phage plaque assay of induced and uninduced EcN iCAP. Absence of IPTG resulted in complete immunity against  $\Phi$ K1-5. IPTG induction rescued sensitivity to  $\Phi$ K1-5. **c**, Co-incubation of EcN  $\Delta kfiC$  transformed with plasmids encoding *kfiC* and *lacI* (referred to as EcN iCAP hereafter) and  $\Phi$ K1-5 in varying concentrations of IPTG. Inversely proportional relationship between IPTG concentration and viability of EcN iCAP were observed. **d**, Growth curve of EcN iCAP in LB media containing  $\Phi$ K1-5. iCAP was pre-induced in various IPTG concentrations. Upon inoculation, rapid bacteria lysis event was observed after 3.5 hours. Inversely proportional relationship between IPTG concentration and bacteria lysis were observed. All error bars represent SEM.

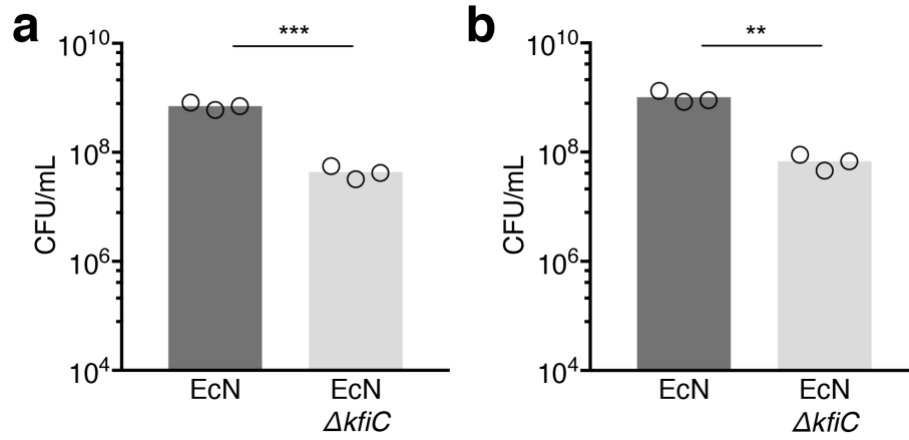

75  
76  
77  
78  
79  
80  
81

**Supplementary Figure 7: Bacterial survival in mouse whole blood.** **a,b**, EcN and EcN  $\Delta kfiC$  were inoculated in mouse whole blood for (a) 1 and (b) 2 hours and plated on LB agar for CFU enumeration (\*\* $P = 0.0005$ , \*\* $P = 0.003$ . Unpaired t-test).

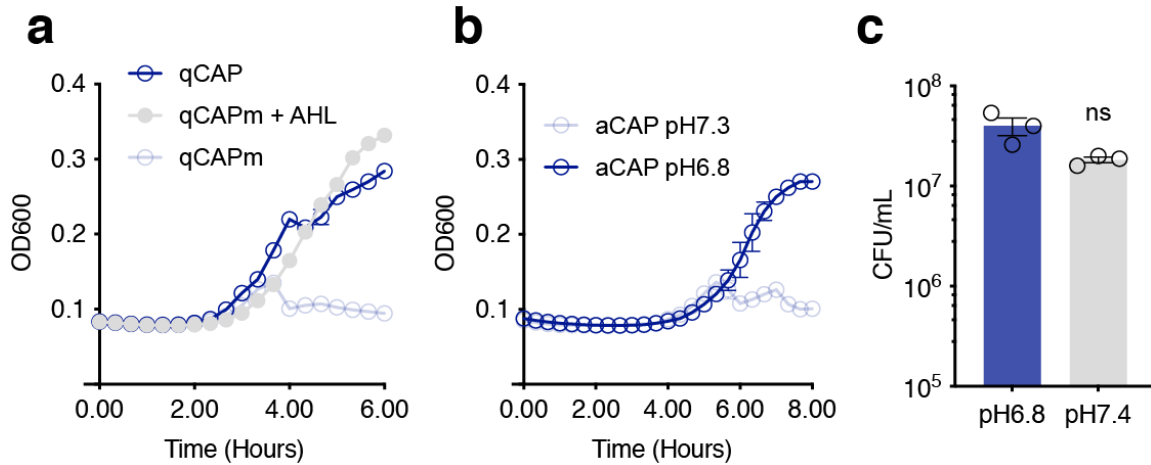

82  
83  
84  
85  
86  
87  
88  
89  
90  
91  
92  
93  
94  
95  
96

**Supplementary Figure 8: Biosensor regulates CAP-mediated survival in phage and blood.** **a**, EcN qCAP were grown in media containing  $\Phi$ K1-5 to measure phage sensitivity. qCAP strain that was allowed to reach stationary phase before inoculating phage was able to grow in the media, suggesting that CAP is suppressed. qCAPm denotes a control strain with mutated *luxI* gene, unable to produce functional AHL to reach quorum. This strain was sensitive to  $\Phi$ K1-5, suggesting CAP expression. Exogenous addition of 10nM AHL allowed for qCAPm strain, supporting that the CAP expression in this system is mediated by quorum sensing mechanism. **b**, EcN aCAP were grown in media containing  $\Phi$ K1-5 to measure phage sensitivity at neutral (pH 7.3) or acidic (pH 6.8) condition. While the bacterial growth was suppressed at neutral condition, aCAP growth was observed in acidic media, suggesting that CAP is repressed in acidic condition. **c**, Control strain with constitutive *kfiC* expression was inoculated in neutral or acidic human whole blood. Blood pH did not affect bacterial survival without aCAP sensing gene circuit.



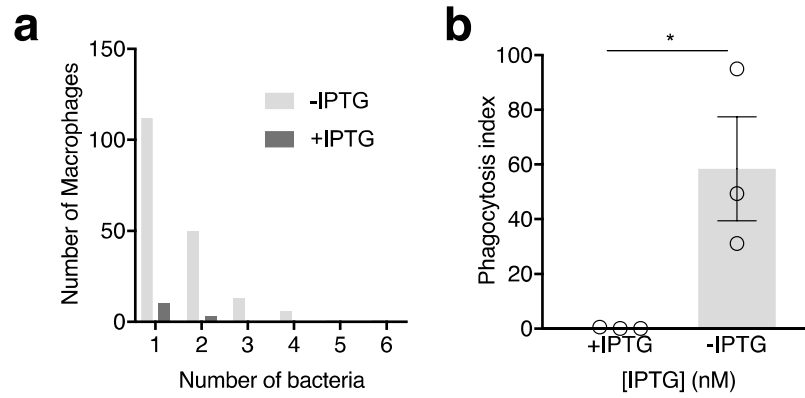

98

99

100 **Supplementary Figure 9: Inducible protection from phagocytosis using iCAP. a,**  
 101 **Histogram showing number of phagocytosed bacteria in murine bone marrow derived**  
 102 **macrophages (BMDM). b, iCAP activation reduced levels of phagocytosis by BMDM (\*P**  
 103 **= 0.037, t-test). Phagocytosis index = (% BMDM containing >1 bacterium) × (mean**  
 104 **number of bacteria per BMDM). All error bars represent SEM.**

105

106

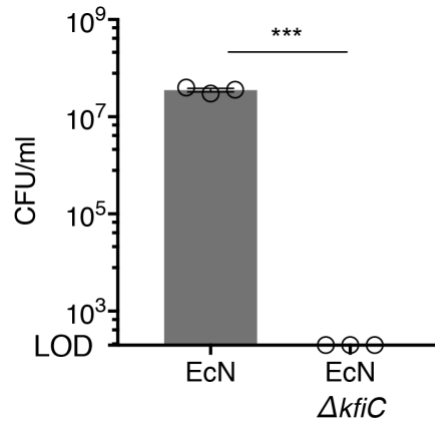

107  
108  
109  
110  
111  
112  
113

**Supplementary Figure 10: Bacterial survival in human plasma.** EcN and EcN  $\Delta kfiC$  were inoculated in mouse whole blood for 0.5 hour and plated on LB agar for CFU enumeration. All error bars represent SEM.

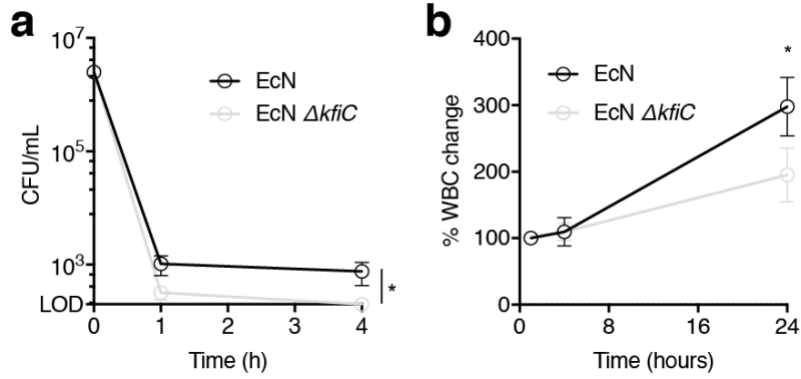

114  
 115  
 116  
 117  
 118  
 119  
 120  
 121  
 122

**Supplementary Figure 11: Change in white blood cell (WBC) count in blood.** EcN induced greater levels of WBC expansion compared to EcN  $\Delta kfiC$ . Difference in WBC levels were observed after 24 hours p.i. (\*P = 0.033, two-way ANOVA with Sidak's multiple comparisons test, n = 5 per group). All error bars represent SEM.

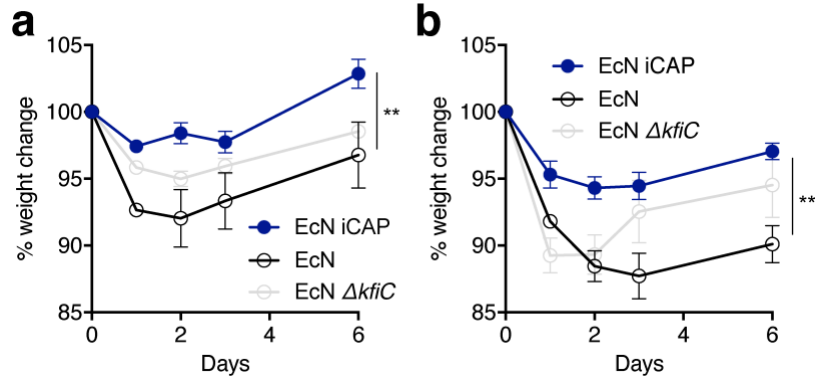

123  
124  
125  
126  
127  
128  
129  
130  
131

**Supplementary Figure 12: Change in animal body weight after intravenous bacterial administration at varying doses. a,b,** Bacteria were intravenously administered to BALB/c mice at (a)  $5 \times 10^6$  CFU and (b)  $1 \times 10^7$  CFU. iCAP group showed minimal drop in weight compared to EcN and EcN  $\Delta kfiC$  groups. (\*\*P = 0.004 and 0.001, two-way ANOVA with Turkey's multiple comparison test. n = 10, 5, 5 mice per group, respectively, for EcN iCAP, EcN, and EcN  $\Delta kfiC$ ). All error bars represent SEM.

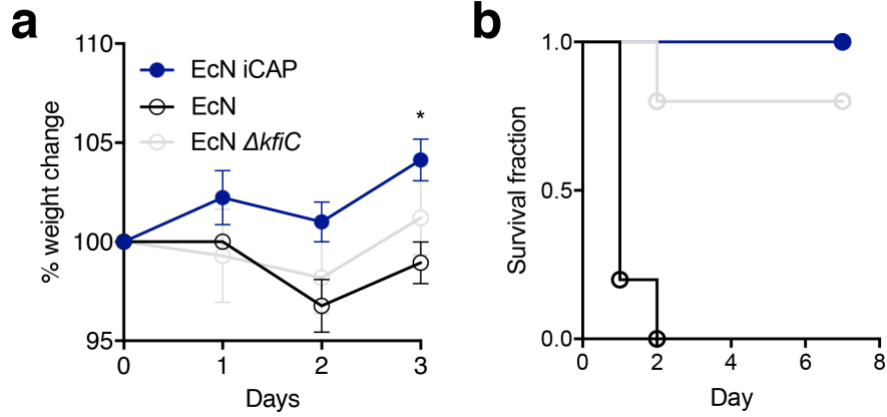

132  
 133  
 134  
 135  
 136  
 137  
 138  
 139  
 140  
 141  
 142

**Supplementary Figure 13: Toxicity characterization of iCAP strains in sepsis model.**  
**a**,  $10^6$  CFU bacteria were intraperitoneally administered to BALB/c mice. iCAP group showed minimal drop in weight compared to EcN and EcN  $\Delta kfiC$  groups. (\* $P = 0.0153$ , two-way ANOVA with Turkey's multiple comparison test.  $n = 5$  mice per group). All error bars represent SEM. **b**, Survival curve after  $10^7$  CFU bacterial administration. Animals injected with EcN iCAP all survived while EcN group all succumbed within 2 days.

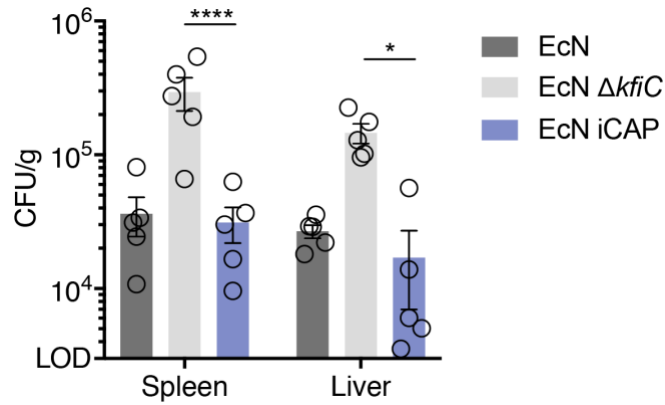

143  
 144  
 145  
 146  
 147  
 148  
 149  
 150  
 151  
 152  
 153

**Supplementary Figure 14: Bacterial biodistribution upon intravenous delivery *in vivo*.** BALB/c mice were intravenously administered with EcN, EcN  $\Delta kfiC$ , or EcN iCAP. EcN iCAP was pre-induced with 10  $\mu$ M IPTG. Spleen and liver were harvested after 1 day, homogenized, and spotted on LB-agar plate for CFU enumeration. Transient protection by EcN iCAP demonstrated reduced CFU in peripheral organs compared to EcN  $\Delta kfiC$ . (\*\*\*\* $P < 0.0001$ , \* $P = 0.0452$ , two-way ANOVA with Turkey's multiple comparison test. LOD =  $3 \times 10^6$  CFU/g). All error bars represent SEM.

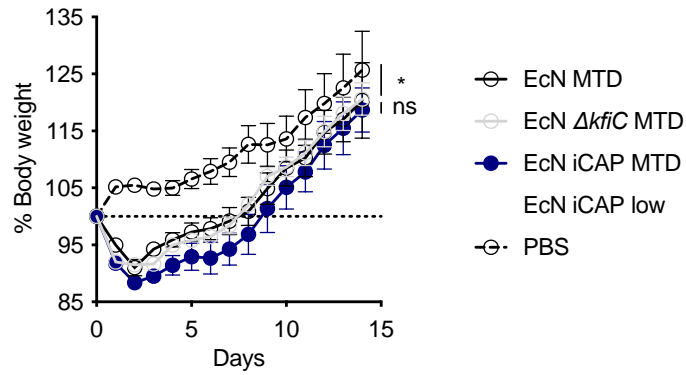

154  
 155  
 156  
 157  
 158  
 159  
 160  
 161  
 162  
 163

**Supplementary Figure 15: Change in animal body weight after bacterial administration at MTD.** Mice were i.v. injected with EcN MTD, EcN  $\Delta kfiC$  MTD, EcN iCAP MTD (pre-induced with 10  $\mu$ M IPTG), or EcN iCAP low (pre-induced with 10  $\mu$ M IPTG) expressing antitumor theta-toxin at  $5 \times 10^6$ ,  $1 \times 10^7$ ,  $5 \times 10^7$ , or  $5 \times 10^6$  CFU, respectively. All animals showed similar drop in body weight at MTD (\* $P = 0.03$ , n.s.  $P > 0.49$ ; two-way ANOVA with Turkey's multiple comparison test;  $n > 4$  mice per group). All error bars represent SEM.

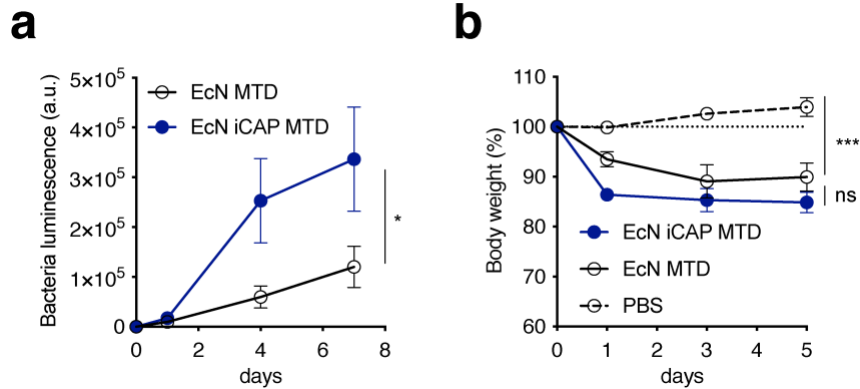

164  
 165  
 166  
 167  
 168  
 169  
 170  
 171  
 172  
 173  
 174  
 175  
 176  
 177  
 178

**Supplementary Figure 16:** Bacterial administration at MTD in PyMT-MMTV model. **a**, Bacterial growth trajectories in PyMT tumors after intravenous delivery *in vivo*. Each line represents average of bacterial growth trajectories in tumors quantified by bacterial luminescence over time for each bacterial strain injected. Tumors injected with EcN iCAP MTD showed higher bacterial luminescence compared to tumor injected with EcN MTD (\* $P = 0.044$ , Two-way ANOVA with Turkey's multiple comparison test;  $n = 15$  tumors for EcN MTD and EcN iCAP MTD groups). Luminescence values are normalized to basal luminescence of individual strains. **b**, Change in animal body weight after bacterial administration at MTD. Mice were i.v. injected with EcN MTD or EcN iCAP MTD (pre-induced with 10  $\mu\text{M}$  IPTG) expressing antitumor theta-toxin. Both groups showed similar drop in animal body weight (\*\* $P = 0.0002$ , n.s.  $P > 0.1$ ; two-way ANOVA with Turkey's multiple comparison test;  $n > 3$  mice per group). All error bars represent SEM.



**a**

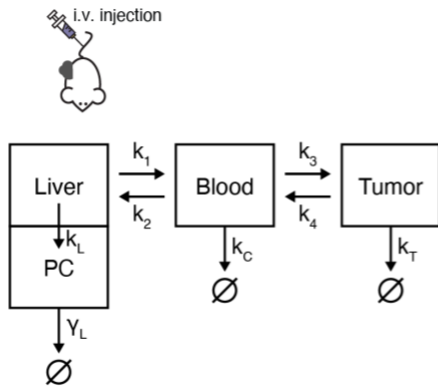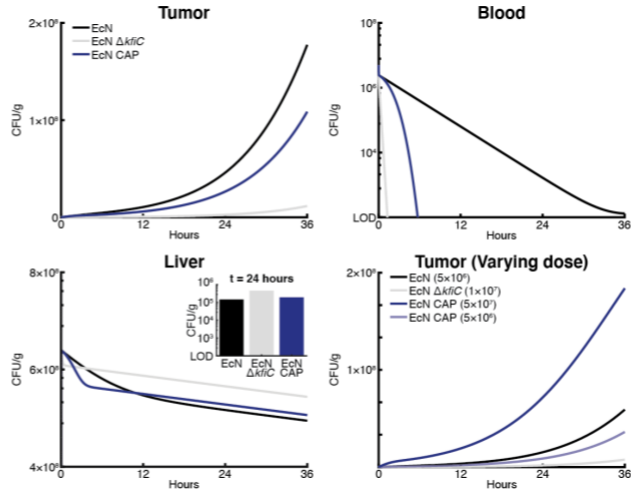

**b**

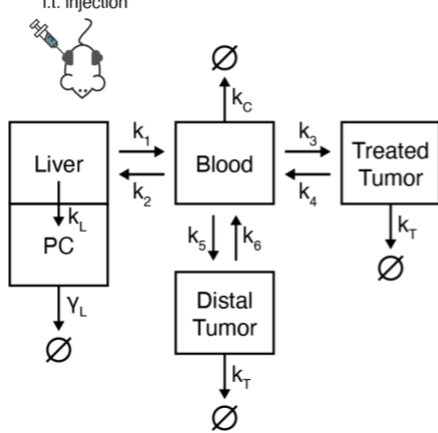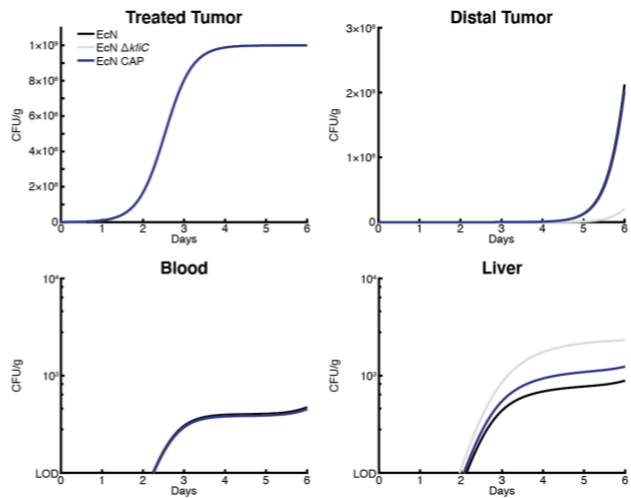

179  
180  
181  
182  
183  
184  
185  
186  
187  
188

**Supplementary Figure 17. Bacterial pharmacokinetics model.** **a**, A 3-compartment pharmacokinetic (PK) model for delivery via i.v. injection. To simulate the i.v. injection, initial conditions are set so that the bacterial population in each compartment other than blood is equal to zero. The magnitude of initial condition in blood acts as the different injection doses. **b**, A 4-compartment PK model for delivery via i.t. injection. To simulate the i.t. injection, the initial conditions are set so that the bacterial population in each compartment other than treated tumor is equal to zero.

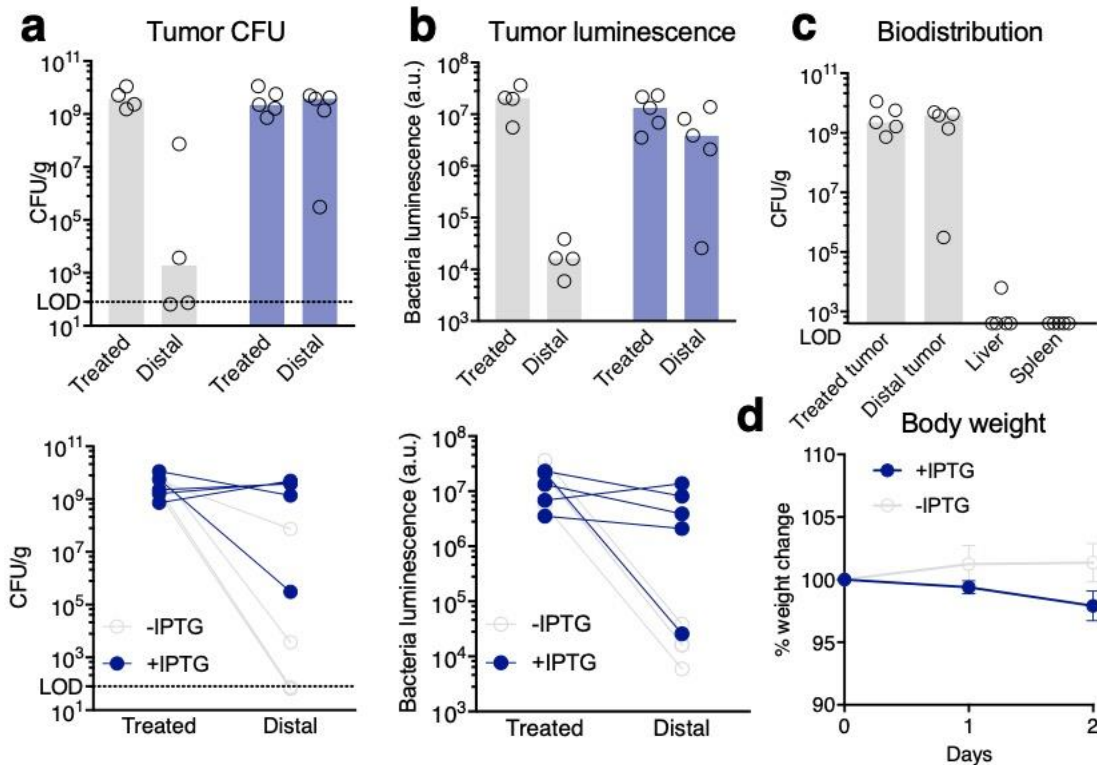

189  
 190  
 191  
 192  
 193  
 194  
 195  
 196  
 197  
 198  
 199  
 200  
 201  
 202  
 203  
 204  
 205  
 206  
 207  
 208

**Supplementary Figure 18: Inducible translocation of EcN iCAP in CT26 model.** **a**, Inducible translocation of EcN iCAP from treated tumors to distal tumors in CFU. Mice bearing subcutaneous CT26 tumors were injected intratumorally with EcN iCAP to one tumor (treated). One group was fed with water containing IPTG 1 day p.i. (+IPTG in blue) to activate iCAP *in situ*. Top graphs represent bacterial CFU in tumors. Tumors were harvested after 3 days p.i., homogenized, and spotted on LB-agar plate for CFU enumeration. Bars denotes medians. Bottom graphs represent bacterial CFU connected with lines showing individual tumor pairs. **b**, Inducible translocation of EcN iCAP from treated tumors to distal tumors quantified by bacterial luminescence. Top graphs represent bacterial luminescence in tumors, corresponding to IVIS images. Tumors were harvested after 3 days p.i. and images *ex vivo*. Bars denotes medians. Bottom graphs represent bacterial luminescence connected with lines showing individual tumor pairs. **c**, Bacterial biodistribution upon intratumoral administration and translocation *in vivo*. Tumors, spleen and liver were harvested after 3 days p.i., homogenized, and spotted on LB-agar plate for CFU enumeration. *In situ* induction of EcN iCAP demonstrated colonization of distal tumors. Bars denotes median. **d**, Change in animal body weight after intratumoral bacterial administration and induced translocation. Graphs represent % change in animal body weight p.i. All error bars represent SEM.

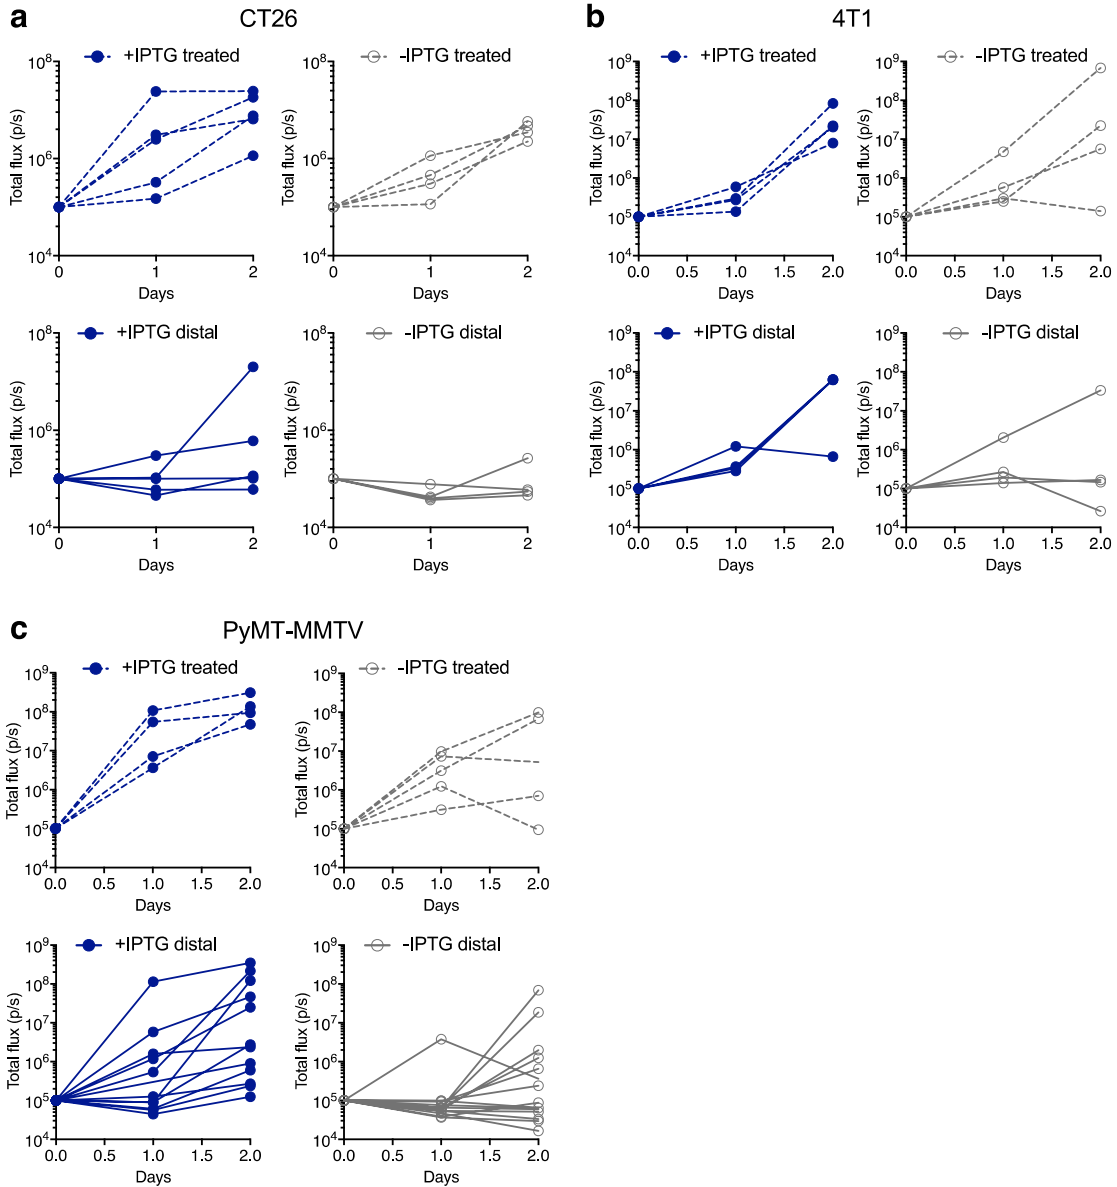

209  
 210  
 211  
 212  
 213  
 214  
 215  
 216  
 217  
 218  
 219  
 220  
 221

**Supplementary Figure 19: Individual bacteria growth trajectories in tumors after intratumoral administration of single tumor flank *in vivo*.** a-c, Mice bearing either (a) subcutaneous CT26, (b) orthotropic 4T1, or (c) spontaneous PyMT-MMTV tumors were injected intratumorally with EcN iCAP to one tumor (treated, dotted lines). One group was fed with water containing IPTG 1 day p.i. (+IPTG, blue lines) to activate iCAP *in situ*. Graphs represent individual bacterial growth trajectories in tumors quantified by bacterial luminescence over time, corresponding to IVIS images. Increasing level of bacterial luminescence in untreated tumors (distal, solid lines) was observed in groups induced with IPTG.

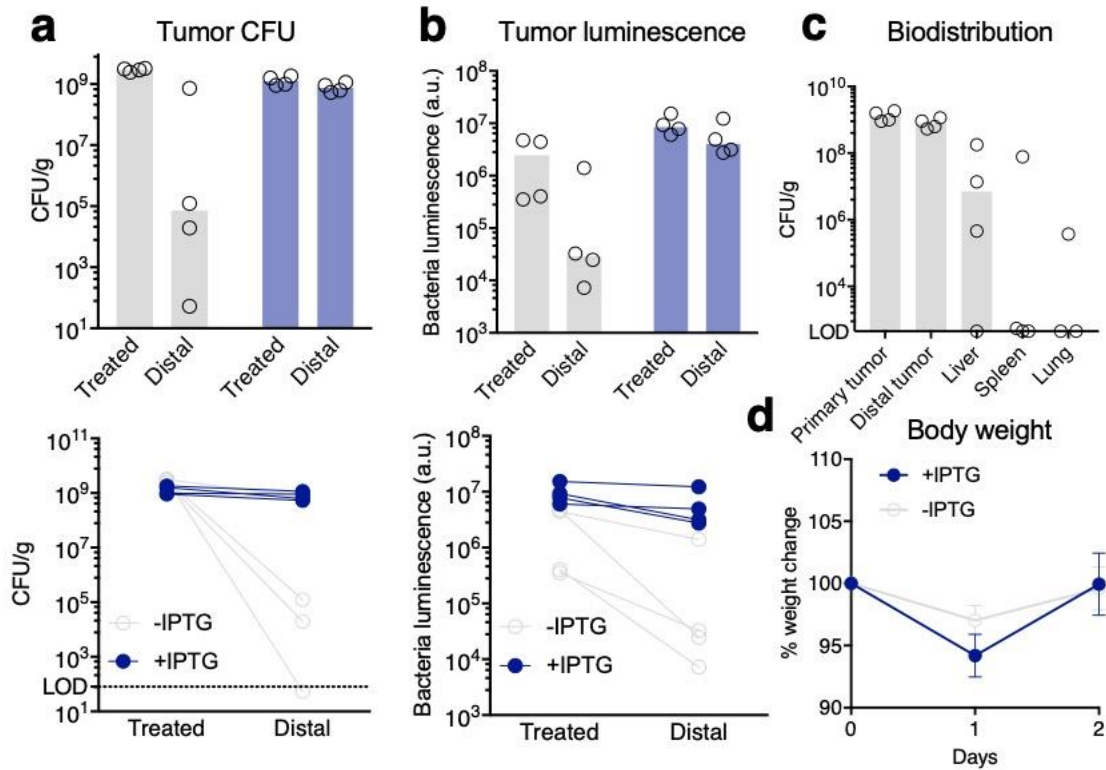

222

223

224

225 **Supplementary Figure 20: Inducible translocation of EcN iCAP in 4T1 model. a,**

226 Inducible translocation of EcN iCAP from treated tumors to distal tumors in CFU. Mice

227 bearing orthotropic 4T1 tumors were injected intratumorally with EcN iCAP to one tumor

228 (treated). One group was fed with water containing IPTG 1 day p.i. (+IPTG in blue) to

229 activate iCAP *in situ*. Top graphs represent bacterial CFU in tumors. Tumors were

230 harvested after 3 days p.i., homogenized, and spotted on LB-agar plate for CFU

231 enumeration. Bars denotes medians. Bottom graphs represent bacterial CFU connected

232 with lines showing individual tumor pairs. **b,** Inducible translocation of EcN iCAP from

233 treated tumors to distal tumors quantified by bacterial luminescence. Top graphs represent

234 bacterial luminescence in tumors, corresponding to IVIS images. Tumors were harvested

235 after 3 days p.i. and images *ex vivo*. Bars denotes medians. Bottom graphs represent

236 bacterial luminescence connected with lines showing individual tumor pairs. **c,** Bacterial

237 biodistribution upon intratumoral administration and translocation *in vivo*. Tumors, spleen

238 and liver were harvested after 3 days p.i., homogenized, and spotted on LB-agar plate for

239 CFU enumeration. *In situ* induction of EcN iCAP demonstrated colonization of distal

240 tumors. Bars denotes median. **d,** Change in animal body weight after intratumoral bacterial

241 administration and induced translocation. Graphs represent % change in animal body

weight p.i. All error bars represent SEM.

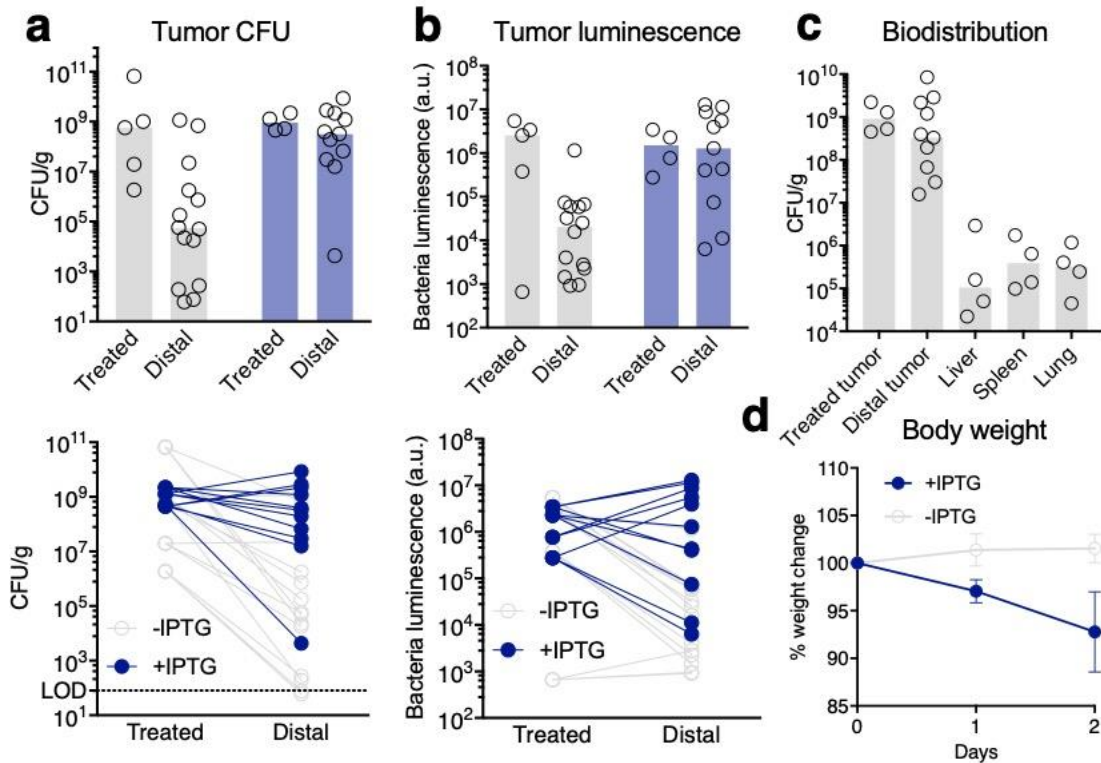

242  
 243  
 244  
 245  
 246  
 247  
 248  
 249  
 250  
 251  
 252  
 253  
 254  
 255  
 256  
 257  
 258  
 259  
 260  
 261  
 262

**Supplementary Figure 21: Inducible translocation of EcN iCAP in PyMT-MMTV model.** **a**, Inducible translocation of EcN iCAP from treated tumors to distal tumors in CFU. Mice bearing spontaneous PyMT-MMTV tumors were injected intratumorally with EcN iCAP to one tumor (treated). One group was fed with water containing IPTG 1 day p.i. (+IPTG in blue) to activate iCAP *in situ*. Top graphs represent bacterial CFU in tumors. Tumors were harvested after 3 days p.i., homogenized, and spotted on LB-agar plate for CFU enumeration. Bars denotes medians. Bottom graphs represent bacterial CFU connected with lines showing individual tumor pairs. **b**, Inducible translocation of EcN iCAP from treated tumors to distal tumors quantified by bacterial luminescence. Top graphs represent bacterial luminescence in tumors, corresponding to IVIS images. Tumors were harvested after 3 days p.i. and images *ex vivo*. Bars denotes medians. Bottom graphs represent bacterial luminescence connected with lines showing individual tumor pairs. **c**, Bacterial biodistribution upon intratumoral administration and translocation *in vivo*. Tumors, spleen and liver were harvested after 3 days p.i., homogenized, and spotted on LB-agar plate for CFU enumeration. *In situ* induction of EcN iCAP demonstrated colonization of distal tumors. Bars denotes median. **d**, Change in animal body weight after intratumoral bacterial administration and induced translocation. Graphs represent % change in animal body weight p.i. All error bars represent SEM.

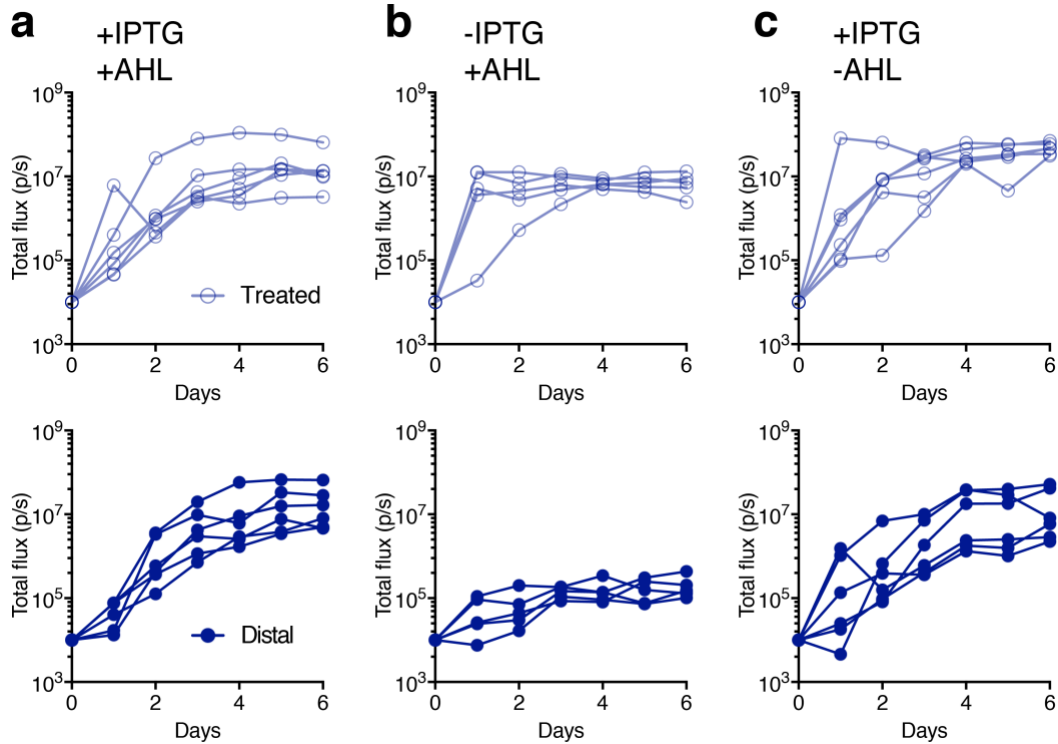

263  
 264  
 265  
 266  
 267  
 268  
 269  
 270  
 271  
 272  
 273  
 274  
 275

**Supplementary Figure 22: Individual growth trajectories of therapeutic bacteria in tumors after intratumoral administration of single tumor flank *in vivo*.** a-c, Mice bearing subcutaneous CT26 tumors were injected intratumorally with EcN iCAP engineered to produce TT when induced with AHL to one tumor. (a) One group was fed with water containing IPTG 1 day p.i. to activate iCAP *in situ*, and subcutaneously injected with AHL to induce TT expression (+IPTG +AHL). (b) One group only received AHL (-IPTG +AHL). (c) One group only received IPTG (+IPTG -AHL). Graphs represent individual bacterial growth trajectories in tumors quantified by bacterial luminescence over time, corresponding to IVIS images. Increasing level of bacterial luminescence in untreated tumors (distal, solid lines) was observed in groups induced with IPTG.

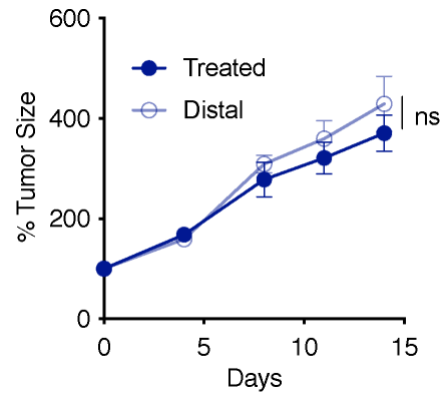

276  
277  
278  
279  
280  
281  
282  
283  
284  
285  
286

**Supplementary Figure 23: Treated and distal CT26 tumors from EcN iCAP control group measured by relative tumor growth over time.** Bacteria were injected into a single treated tumor. The translocation was controlled by IPTG water. After 3 days of initial injection, AHL were administered to induce therapeutic expression. iCAP control does not contain theta-toxin gene. (n.s.  $P = 0.92$ , two-way ANOVA with Bonferroni posttest,  $n = 6$  for both treated and distal tumors). All error bars represent standard error of mean (SEM).

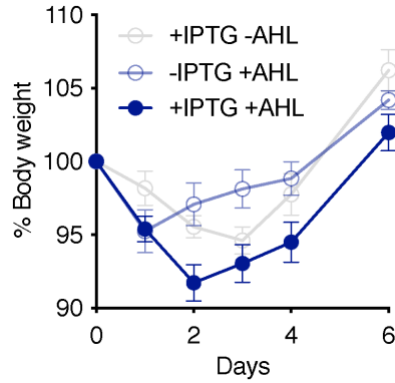

287  
 288  
 289  
 290  
 291  
 292  
 293  
 294  
 295  
 296  
 297  
 298

**Supplementary Figure 24: Change in animal body weight after intratumoral therapeutic bacterial administration and induced translocation.** Mice bearing subcutaneous CT26 tumors were injected intratumorally with EcN iCAP engineered to produce TT when induced with AHL to one tumor. One group was fed with water containing IPTG 1 day p.i. (+IPTG -AHL) to activate iCAP *in situ*. One group was subcutaneously injected with AHL to induce TT expression (-IPTG +AHL). One group received both IPTG and AHL (+IPTG +AHL). Graphs represent % change in animal body weight p.i. All error bars represent SEM.



| Identifier        | Bacterial Strains                        | Plasmids (ORI/promoter)       | Relevant Features                                                                                                     | Figure                      |
|-------------------|------------------------------------------|-------------------------------|-----------------------------------------------------------------------------------------------------------------------|-----------------------------|
| EcN               | <i>E. coli</i> Nissle 1917               | N/A                           | N/A                                                                                                                   | 2, 4, 5, S1-4, S7, S10-15   |
| K1                | <i>E. coli</i> K1 strain                 | N/A                           | N/A                                                                                                                   | S1, S5                      |
| K5                | <i>E. coli</i> K5 strain                 | N/A                           | N/A                                                                                                                   | S5                          |
| MG1655            | <i>E. coli</i> MG1655 strain             | N/A                           | N/A                                                                                                                   | S1                          |
| VNP20009          | <i>S. typhimurium</i> VNP20009           | N/A                           | N/A                                                                                                                   | S1                          |
| EcN KD            | <i>E. coli</i> Nissle 1917               | ColE1/pPR                     | sRNA with MicC scaffold binding to gene of interest                                                                   | 2, S2                       |
| EcN KO            | <i>E. coli</i> Nissle 1917               | N/A                           | Genomic deletion of <i>kfi</i> genes                                                                                  | S2                          |
| EcN $\Delta kfiC$ | <i>E. coli</i> Nissle 1917 $\Delta kfiC$ | N/A                           | Genomic deletion of <i>kfiC</i> gene                                                                                  | 2, 4, 5, S2-4, S7, S10-15   |
| EcN iCAP          | <i>E. coli</i> Nissle 1917 $\Delta kfiC$ | Sc101/ptac                    | <i>kfiC</i> gene expressed under ptac promoter                                                                        | 3-6, S6, S9, S12-15, S17-20 |
| EcN qCAP          | <i>E. coli</i> Nissle 1917 $\Delta kfiC$ | ColE1/ptac<br><br>P15A/pluxI  | <i>kfiC</i> gene expressed under ptac promoter<br><br><i>luxI</i> and <i>lacI</i> gene expressed under pluxI promoter | 4, S8                       |
| EcN aCAP          | <i>E. coli</i> Nissle 1917 $\Delta kfiC$ | ColE1/ptac<br><br>P15A/pCadC  | <i>kfiC</i> gene expressed under ptac promoter<br><br><i>lacI</i> gene expressed under pCadC promoter                 | 4, S8                       |
| EcN iCAP TT       | <i>E. coli</i> Nissle 1917 $\Delta kfiC$ | Sc101/ptac<br><br>ColE1/pluxI | <i>kfiC</i> gene expressed under ptac promoter<br><br><i>theta</i> gene expressed under pluxI promoter                | 5, 6, S15, S21-23           |

| Parameter  | Definition                                      | Value                                                                                            |
|------------|-------------------------------------------------|--------------------------------------------------------------------------------------------------|
| $g$        | Bacterial growth rate                           | 13                                                                                               |
| $K$        | Bacteria carrying capacity                      | 0.05                                                                                             |
| $k_1$      | Transfer constant from blood to liver           | 1000                                                                                             |
| $k_2$      | Transfer constant from liver to blood           | 1000                                                                                             |
| $k_3$      | Transfer constant from blood to (treated) tumor | 10                                                                                               |
| $k_4$      | Transfer constant from (treated) tumor to blood | 0.00001                                                                                          |
| $k_5$      | Transfer constant from blood to distal tumor    | 10                                                                                               |
| $k_6$      | Transfer constant from distal tumor to blood    | 0.00001                                                                                          |
| $\gamma_L$ | Rate of phagocytic lysis in liver               | 1                                                                                                |
| $\sigma_C$ | Rate of complement-mediated lysis               | 15 (EcN/+CAS)<br>50 (EcN/-CAS)                                                                   |
| $C_{50}$   | Maximum concentration of complements            | 1                                                                                                |
| $\sigma_T$ | Phagocytic elimination rate in the tumor        | 10                                                                                               |
| $\sigma_L$ | Phagocytic capturing rate in the liver          | 0.01 (EcN/+CAS)<br>5 (EcN/-CAS)                                                                  |
| $M_T$      | Maximum bacterial clearance in tumor            | 1                                                                                                |
| $M_L$      | Maximum bacterial clearance in liver            | 1                                                                                                |
| $\chi$     | Non linearity in phagocytic capturing function  | 2                                                                                                |
| $\mu$      | Logistic growth rate of switch parameters       | 10 ( $\sigma_C$ , IV)<br>20 ( $\sigma_L$ , IV)<br>10 ( $\sigma_C$ , IT)<br>20 ( $\sigma_L$ , IT) |

**Supplementary Table 2.** Parameters used for the simulations.

## Supplementary Note on Computational Model Derivation

To simulate the probiotic biodistribution resulting from the programmable probiotic encapsulation system, we used pharmacokinetic (PK) compartmental modeling. Due to the scope of the paper and its modeling requirements, we examined biodistribution to only the most essential compartments. We adopted relatively simple methods used to model nanoparticle delivery [1,2] to determine how the compartments are constructed. Thus, our model contains a single blood compartment as opposed to distinct arterial and venous compartments, and the liver compartment has an additional subcompartment for phagocytosis-captured bacteria. We assume each major compartment to have the same bacterial carrying capacity (*i.e.*, same volume and maximum concentration of bacteria).

### A. Three-Compartment PK Model for Intravenous Delivery

We applied a three-compartment PK model for delivery via intravenous (i.v.) injection (Supplementary Fig. 17a). As mentioned above, the compartments include blood, liver, and tumor. Tumor was selected as one of the three compartments because it is the therapeutic target. Blood and liver were selected because they contain the main modalities for host immune clearance of injected bacteria.

Movements of bacteria between the main compartments (blood, liver, and tumor) are determined by transfer constants  $k_{1-4}$  and the amount of bacteria available in each compartment. The blood compartment is the facilitator of bacteria distribution between the other periphery compartments. Transfer between the blood and liver compartments is governed by  $k_1$  and  $k_2$ , and transfer between the blood and tumor compartments is governed by  $k_3$  and  $k_4$ . The various functions of the host immune system are governed by  $k_C$ ,  $k_L$ ,  $k_T$  and  $\gamma_L$ .  $k_C$  is the rate constant of bacterial elimination in the blood by way of complement-mediated lysis,  $k_L$  is the rate constant of phagocytic “capturing” in the liver, and  $k_T$  is the rate constant of phagocytic elimination in the tumor. Phagocytic capturing rate constant,  $k_L$ , is a one-way transfer constant that moves bacteria from the main liver compartment into the phagocytic subcompartment. Once bacteria have been transferred into the phagocytic subcompartment, it cannot be transferred back into the main compartment. The captured bacteria is eliminated at rate governed by  $\gamma_L$ .

As is customary in PK modeling, our model consists of a system of differential equations where relevant terms are multiplied by the bacterial population in source compartments then added together. Overall bacterial growth dynamics is modeled using logistic growth. Each compartment is assumed to have the same bacterial growth rate  $g$  and carrying capacity  $K$ . To simulate the i.v. injection itself, initial conditions are set so that the bacterial population in each compartment other than in the blood is equal to zero. The magnitude of the positive initial condition acts as the injection dosage. The full set of equations can be found below.

$$\frac{dB}{dt} = gB + k_2L + k_4T - (k_1 + k_3 + k_C)B \quad (1)$$

$$\frac{dL}{dt} = gL + k_1B - (k_2 + k_L)L \quad (2)$$

$$\frac{dT}{dt} = [gT + k_3B - (k_4 + k_T)T](1 - \frac{T}{K}) \quad (3)$$

$$\frac{dPC_L}{dt} = L - \gamma_L PC_L \quad (4)$$

$$k_C = \frac{\sigma_C}{C_{50} + B} \quad (5)$$

$$k_L = \frac{\sigma_L}{M_L L^x + 1} \quad (6)$$

$$k_T = \frac{\sigma_T}{M_T T^x + 1} \quad (7)$$

343

### 344 **B. Host Immune Clearance**

345 Bacteria in our model is eliminated by two main host immune modalities: phagocytosis in  
 346 the liver and complement-mediated lysis in the blood. To model phagocytosis, we included  
 347 a subcompartment that contains the population of captured bacteria still alive in  
 348 phagosomes. Bacteria that enter the subcompartment cannot escape and are eventually  
 349 lysed at a constant rate  $\gamma_L$ . The phagocytic capturing term  $k_L$  is not constant but rather  
 350 follows equation 6. Also not constant, the rate of phagocytic elimination from the tumor  $k_T$   
 351 follows equation 7. These equations were derived by simplifying equations used on the  
 352 development of a model for three-stage immune response [3]. In [3], equation 8 is used to  
 353 depict the interaction between pneumococcal population and resident alveolar  
 354 macrophages. This interaction is similar to the bacteria-immune response relationship we  
 355 are attempting to model. The derivation for the rates of phagocytic capturing and  
 356 elimination in our model is as follows:

$$\begin{aligned} \gamma_{MA} f(B, M_A^*) &= \gamma_{MA} \times \frac{n^x M_A^*}{B^x + n^x M_A^*} \\ &= \frac{\gamma_{MA}}{M_B B^x + 1} \text{ where } M_B = \frac{1}{n^x M_A^*} \end{aligned} \quad (8)$$

Redefine constants:

- $\sigma_i = \gamma_{MA}$
- $k_i = \gamma_{MA} f(i, M_i^*)$

Let  $i$  = organ and assume  $n$ ,  $x$  constant for each organ but  $\gamma_{MA}$  variable.

$$k_i = \frac{\sigma_i}{M_i i^x + 1} \quad (9)$$

357 The parameter definitions for equation 8 can be found in [3], and the parameter definitions  
 358 for equation 9 can be found in *Parameter Selection*.

359

360 In our model, complement-mediated lysis in the blood is regulated by a single term that  
 361 depends on multiple parameter constants and variable bacteria population in the blood  
 362 compartment. Current methods to model complement-mediated lysis entails modeling the  
 363 dynamics for each protein involved in the complement cascade and in the formation of the  
 364 MAC [4,5,6]. These methods proved to be too complex for the scope of our project. Thus,  
 365 we adapted the equation component describing bacterial effect on cytokine expression in

366 [7] to describe bacterial elimination via complement-mediated lysis in our model. The  
 367 cytokines in [7] characterize an indirect host immune response. In addition, cytokines play  
 368 a critical role in initiating the complement cascade [9]. The adapted equation can be found  
 369 in equation 6 and corresponding parameter definitions can be found in *Parameter*  
 370 *Selection*.

371

### 372 **C. Four-Compartment PK Model for Intratumoral Delivery**

373 To model bacterial delivery via intratumoral injection (i.t.), we applied a four-compartment  
 374 PK model (Supplementary Fig. 17b). The same principles and equation structures used in  
 375 the three-compartment iv. model are also used in this four-compartment model. However,  
 376 the tumor compartment is split into two main compartments: treated tumor and distal tumor.  
 377 This split is necessary to examine tumor trafficking observed in the experimental data. To  
 378 simulate the i.t. injection itself, initial conditions are set so that the bacterial population in  
 379 each compartment other than in the treated tumor is equal to zero. The full set of equations  
 380 for the four-compartment model is as the following:

$$\frac{dB}{dt} = gB + k_2L + k_4T - (k_1 + k_3 + k_C)B \quad (10)$$

$$\frac{dL}{dt} = gL + k_1B - (k_2 + k_L)L \quad (11)$$

$$\frac{dT_p}{dt} = [gT_p + k_3B - (k_4 + k_{T_p})T_p](1 - \frac{T_p}{K}) \quad (12)$$

$$\frac{dT_d}{dt} = [gT_d + k_5B - (k_6 + k_{T_d})T_d](1 - \frac{T_d}{K}) \quad (13)$$

$$\frac{dPC_L}{dt} = k_L L - \gamma_L PC_L \quad (14)$$

$$k_C = \frac{\sigma_C}{C_{50} + B} \quad (15)$$

$$k_L = \frac{\sigma_L}{M_L L^x + 1} \quad (16)$$

$$k_{T_p} = \frac{\sigma_T}{M_T T_p^x + 1} \quad (17)$$

$$k_{T_d} = \frac{\sigma_T}{M_T T_d^x + 1} \quad (18)$$

381

### 382 **D. Switch Kinetics**

383 In order to model the EcN inducible capsular polysaccharides (iCAP) switch kinetics  
 384 between the EcN and the EcN  $\Delta kfiC$  host immune parameter values, we apply logistic  
 385 growth where each parameter  $\sigma_C$  and  $\sigma_L$  share different growth rates  $\mu$ . Parameter switch  
 386 growth rates  $\mu$  were adjusted so that the parameters  $\sigma_L$  and  $\sigma_C$  would plateau at  
 387 approximately the same time. Using the logistic growth equation, we are able to precisely  
 388 control the EcN iCAP parameter values associated with EcN and EcN  $\Delta kfiC$  as well as the  
 389 speed of the switch kinetics. The EcN iCAP parameters switch from those of EcN to EcN

390  $\Delta k_{fi}C$  for three-compartment i.v. model whereas the parameters switch from those of EcN  
391  $\Delta k_{fi}C$  to EcN for the four-compartment i.t. model.

392

393

### **E. Parameter Selection**

394

395

396

397

398

399

400

401

402

403

To select parameters, we initially followed the relative values found in [8]. Therefore, transfer of bacteria between the blood and liver compartments is much greater than between the blood and tumor compartments. Afterwards, we manipulated the remaining parameters so that the model would produce simulations that resemble trends found in the experimental data. To replicate the CFU levels found in the experimental data, the simulation values are scaled up by a constant defined by the ratio of the assumed experimental carrying capacity ( $1 \cdot 10^9$ ) to the simulation carrying capacity (0.05). The complete list of parameters and their corresponding definitions can be found in Supplementary Table 2.

404

### **F. Limitations**

405

406

407

408

409

The computational model is primarily limited by its implementation as a system of differential equations. Solutions to differential equations are unable to reach absolute zero. As a result, tumor biodistribution at all capsule settings in both the i.v. and i.t. models always reach carrying capacity. However, the experimental results show that tumor trafficking can be suppressed in i.t. models when EcN iCAP is not induced (Fig. 6c).

410 **Supplementary References**

411

412 [1] Ouyang, B., Poon, W., Zhang, Y. N., Lin, Z. P., Kingston, B. R., Tavares, A. J., Zhang,  
413 Y., Chen, J., Valic, M. S., Syed, A. M., MacMillan, P., Couture-Senécal, J., Zheng, G., &  
414 Chan, W. The dose threshold for nanoparticle tumour delivery. *Nat Mater* **19**, 1362–1371,  
415 doi:10.1038/s41563-020-0755-z (2020).

416

417 [2] Cheng, Y. H., He, C., Riviere, J. E., Monteiro-Riviere, N. A., & Lin, Z. Meta-Analysis of  
418 Nanoparticle Delivery to Tumors Using a Physiologically Based Pharmacokinetic  
419 Modeling and Simulation Approach. *ACS Nano*, **14**, 3075–3095,  
420 doi:10.1021/acsnano.9b08142 (2020).

421

422 [3] Smith, A. M., McCullers, J. A., & Adler, F. R. Mathematical model of a three-stage  
423 innate immune response to a pneumococcal lung infection. *Journal of theoretical biology*,  
424 **276**, 106–116, doi:10.1016/j.jtbi.2011.01.052 (2011).

425

426 [4] Laranjeira S., Symmonds M., Palace J., Payne S. J., Orłowski P. A mathematical model  
427 of cellular swelling in Neuromyelitis optica. *J Theor Biol* **433**, 39–48, doi:  
428 10.1016/j.jtbi.2017.08.020 (2017)

429

430 [5] Liu, B., Zhang, J., Tan, P. Y., Hsu, D., Blom, A. M., Leong, B., Sethi, S., Ho, B., Ding,  
431 J. L., & Thiagarajan, P. S. A computational and experimental study of the regulatory  
432 mechanisms of the complement system. *PLoS Comput Biol*, **7**, e1001059,  
433 doi:10.1371/journal.pcbi.1001059 (2011).

434

435 [6] Caruso, A., Vollmer, J., Machacek, M., & Kortvely, E. Modeling the activation of the  
436 alternative complement pathway and its effects on hemolysis in health and disease. *PLoS*  
437 *Comput Biol*, **16**, e1008139, doi:10.1371/journal.pcbi.1008139 (2020).

438

439 [7] Diep, J. K., Russo, T. A., & Rao, G. G. Mechanism-Based Disease Progression Model  
440 Describing Host-Pathogen Interactions During the Pathogenesis of *Acinetobacter*  
441 *baumannii* Pneumonia. *CPT Pharmacometrics Syst Pharmacol*, **7**, 507–516,  
442 doi:10.1002/psp4.12312 (2018).

443

444 [8] Dogra, P., Butner, J. D., Chuang, Y. L., Caserta S. Goel, S., Brinker, C.J., Cristini, V.,  
445 & Wang, Z. Mathematical modeling in cancer nanomedicine: a review. *Biomed*  
446 *Microdevices*, **21**, 40, doi:10.1007/s10544-019-0380-2 (2019).

447

448 [9] Klos, A., Wende, E., Wareham, K. J., & Monk, P. N. International Union of Basic and  
449 Clinical Pharmacology. LXXXVII. Complement Peptide C5a, C4a, and C3a Receptors.  
450 *Pharmacol Rev*, **65**, 500543; doi:10.1124/pr.111.005223 (2013).

451
